# Supplementary material for: Reliable charge assessment on encapsulated fragment for endohedral systems
Source: PubMed Central journal article supplement (PMC5811527; doi:10.1038/s41598-018-21240-0), 2018-02-13
Supplement: 41598_2018_21240_MOESM1_ESM.pdf [file 41598_2018_21240_MOESM1_ESM.pdf]

Supporting Information of

## Reliable charge assessment on encapsulated fragment for endohedral systems.

A. J. Stasyuk,<sup>\*a</sup> M. Solà<sup>\*a</sup> and A.A. Voityuk<sup>\*a,b</sup>

| Table of contents                                                                                                                 |                                                                                                                                                                                                                                                                                                            | Page |
|-----------------------------------------------------------------------------------------------------------------------------------|------------------------------------------------------------------------------------------------------------------------------------------------------------------------------------------------------------------------------------------------------------------------------------------------------------|------|
| Computational details                                                                                                             |                                                                                                                                                                                                                                                                                                            | S2   |
| Table S1                                                                                                                          | Charge compensations schemes (CCS1 – CCS5) used for verification of Cl 1s orbital energy dependence on compensation charge distribution method. Units are electrons.                                                                                                                                       | S3   |
| Figure S1                                                                                                                         | Calibration curves and equations of approximating functions obtained for tested charge compensation schemes (CCS1 – CCS5).                                                                                                                                                                                 | S8   |
| Table S2                                                                                                                          | Values of Cl 1s orbital energies accessed with various charge compensation schemes (CCS1-CCS5), corrections to electrostatic potentials as well as predicted charges on encapsulated fragment obtained within framework of different CCS for Cl@B39 system. Energies in hartrees and charges in electrons. | S9   |
| Figure S2                                                                                                                         | Calibration curves and equations of approximating functions constructed for charge prediction on central Cu fragment in Cu@B <sub>39</sub> complex based on 1s, 2s, and 3s orbital energies.                                                                                                               | S10  |
| Figure S3                                                                                                                         | Graphical representations X@B39 type of systems investigated in present work.                                                                                                                                                                                                                              | S11  |
| Figure S4                                                                                                                         | Correlations of the Mulliken, Löwdin, Hirshfeld, CM5, NPA, and QTAIM charges (in electrons) with the results obtained by the proposed method.                                                                                                                                                              | S12  |
| Table S3                                                                                                                          | Slope ( $\alpha$ ), intercept ( $\beta$ ), residual sum of squares (RSS) and R-square ( $R^2$ ) values for correlations of the Mulliken, Löwdin, Hirshfeld, CM5, NPA, and QTAIM charges with the results obtained by the proposed method.                                                                  | S13  |
| Table S4                                                                                                                          | Cartesian coordinates (in Å) for the studied systems.                                                                                                                                                                                                                                                      | S14  |
| General description of calibration curves construction for charge assessment on encapsulated fragment for X@YY endohedral system. |                                                                                                                                                                                                                                                                                                            | S19  |
| Table S5                                                                                                                          | Charge distribution data and calibration curves for studied systems.                                                                                                                                                                                                                                       | S20  |
| References                                                                                                                        |                                                                                                                                                                                                                                                                                                            | S33  |

## Computational details.

Recently we have demonstrated that electronic properties of molecular endohedral borospherenes can be reliably described using DFT.<sup>1</sup> Geometrical structures of the endohedral complexes studied in present work were studied using density functional theory (DFT) with PBE1PBE (hereafter also termed as PBE0) hybrid functional in the ground state. Ahlrichs Def2-TZVP basis sets<sup>2, 3</sup> triple- $\xi$  quality basis set was employed in all cases. All calculations were carried out using Gaussian 09 (Rev. E.01).<sup>4</sup> The population analysis performed within Mulliken<sup>5, 6</sup>, Lowdin<sup>7</sup>, Hirshfeld<sup>8, 9</sup> and CM5<sup>10</sup> schemes were carried out using code implemented in Gaussian 09. Topological analyses of the electron distributions were conducted according to the “Quantum Theory of Atoms in Molecules” (QTAIM) proposed by Bader.<sup>11, 12</sup> The QTAIM calculations were performed using the AIMALL suite of programs.<sup>13</sup> Natural Population Analysis (NPA) was carried out with NBO 6.0 program.<sup>14</sup>

**Table S1.** Charge compensations schemes (CCS) used for verification of Cl 1s orbital energy dependence on compensation charge distribution method. Detailed description of particular CCS scheme provide in main text. Units are electrons.

| Point charge    | CCS1             | CCS2     | CCS3     | CCS4     | CCS5     |
|-----------------|------------------|----------|----------|----------|----------|
|                 | Cl <sup>2-</sup> |          |          |          |          |
| q <sub>1</sub>  | 0.05128          | -0.04562 | 0.05150  | 0.39999  | 0.58760  |
| q <sub>2</sub>  | 0.05128          | 0.15307  | -0.15840 | 0.20329  | -0.25994 |
| q <sub>3</sub>  | 0.05128          | 0.14744  | 0.21500  | -0.02467 | -0.13984 |
| q <sub>4</sub>  | 0.05128          | -0.12873 | 0.01397  | -0.21854 | 0.09584  |
| q <sub>5</sub>  | 0.05128          | 0.05693  | -0.10389 | -0.45001 | -0.25040 |
| q <sub>6</sub>  | 0.05128          | -0.03604 | 0.09483  | 0.43626  | 0.80456  |
| q <sub>7</sub>  | 0.05128          | -0.03602 | -0.01656 | 0.57442  | 0.60335  |
| q <sub>8</sub>  | 0.05128          | 0.00714  | 0.26886  | 0.28522  | 0.12787  |
| q <sub>9</sub>  | 0.05128          | 0.08091  | 0.09396  | -0.34974 | -0.16209 |
| q <sub>10</sub> | 0.05128          | -0.05192 | -0.52281 | 0.44656  | 0.65451  |
| q <sub>11</sub> | 0.05128          | 0.08773  | 0.40904  | -0.14877 | -0.15680 |
| q <sub>12</sub> | 0.05128          | 0.08010  | -0.09118 | -0.12561 | -0.08282 |
| q <sub>13</sub> | 0.05128          | 0.07533  | -0.20293 | 0.03466  | 0.11105  |
| q <sub>14</sub> | 0.05128          | 0.18411  | 0.21150  | 0.05128  | -0.12070 |
| q <sub>15</sub> | 0.05128          | -0.04991 | -0.03019 | 0.56298  | 0.90852  |
| q <sub>16</sub> | 0.05128          | -0.10511 | 0.36177  | 0.05110  | 0.41788  |
| q <sub>17</sub> | 0.05128          | 0.15151  | -0.13516 | -0.07971 | -0.42133 |
| q <sub>18</sub> | 0.05128          | -0.09485 | 0.34931  | 0.39922  | 0.66112  |
| q <sub>19</sub> | 0.05128          | 0.06707  | -0.10362 | -0.31363 | -0.55948 |
| q <sub>20</sub> | 0.05128          | 0.17995  | 0.28964  | 0.01125  | -0.11852 |
| q <sub>21</sub> | 0.05128          | 0.13477  | 0.12985  | -0.05210 | -0.17908 |
| q <sub>22</sub> | 0.05128          | 0.11394  | 0.10215  | 0.13658  | -0.12492 |
| q <sub>23</sub> | 0.05128          | -0.03320 | 0.14342  | 0.05511  | 0.14868  |
| q <sub>24</sub> | 0.05128          | 0.11163  | -0.04345 | -0.40100 | -0.47046 |
| q <sub>25</sub> | 0.05128          | 0.13210  | -0.05152 | -0.11750 | -0.35273 |
| q <sub>26</sub> | 0.05128          | 0.15541  | 0.01344  | -0.03770 | -0.43480 |
| q <sub>27</sub> | 0.05128          | 0.12277  | 0.51709  | 0.14336  | -0.10286 |
| q <sub>28</sub> | 0.05128          | 0.19329  | 0.20768  | -0.00533 | -0.51697 |
| q <sub>29</sub> | 0.05128          | 0.16975  | 0.25811  | 0.01566  | -0.31878 |
| q <sub>30</sub> | 0.05128          | 0.06085  | -0.19662 | 0.56713  | 0.34339  |
| q <sub>31</sub> | 0.05128          | -0.02365 | -0.44379 | 0.61305  | 0.72730  |
| q <sub>32</sub> | 0.05128          | -0.04661 | 0.12142  | 0.39394  | 0.72918  |
| q <sub>33</sub> | 0.05128          | 0.13196  | 0.06513  | -0.03567 | -0.30795 |
| q <sub>34</sub> | 0.05128          | 0.07166  | 0.06034  | -0.16396 | 0.09423  |
| q <sub>35</sub> | 0.05128          | -0.11967 | 0.12839  | -0.19129 | 0.32029  |
| q <sub>36</sub> | 0.05128          | 0.05424  | -0.22468 | 0.00716  | -0.06257 |
| q <sub>37</sub> | 0.05128          | -0.09248 | 0.01488  | 0.22938  | 0.32371  |

|                 |                  |          |          |          |          |
|-----------------|------------------|----------|----------|----------|----------|
| q <sub>38</sub> | 0.05128          | 0.09819  | -0.01584 | -0.48744 | -0.19846 |
| q <sub>39</sub> | 0.05128          | 0.04190  | 0.23497  | -0.41478 | -0.31753 |
|                 | Cl <sup>1-</sup> |          |          |          |          |
| q <sub>1</sub>  | 0.02564          | -0.02281 | 0.02575  | 0.19999  | -0.02571 |
| q <sub>2</sub>  | 0.02564          | 0.07653  | -0.07920 | 0.10164  | 0.01691  |
| q <sub>3</sub>  | 0.02564          | 0.07372  | 0.10750  | -0.01233 | 0.04183  |
| q <sub>4</sub>  | 0.02564          | -0.06436 | 0.00698  | -0.10927 | 0.01936  |
| q <sub>5</sub>  | 0.02564          | 0.02846  | -0.05194 | -0.22500 | 0.04913  |
| q <sub>6</sub>  | 0.02564          | -0.01802 | 0.04741  | 0.21813  | -0.02129 |
| q <sub>7</sub>  | 0.02564          | -0.01801 | -0.00828 | 0.28721  | -0.01712 |
| q <sub>8</sub>  | 0.02564          | 0.00357  | 0.13443  | 0.14261  | 0.00325  |
| q <sub>9</sub>  | 0.02564          | 0.04045  | 0.04698  | -0.17487 | 0.06531  |
| q <sub>10</sub> | 0.02564          | -0.02596 | -0.26140 | 0.22328  | -0.02330 |
| q <sub>11</sub> | 0.02564          | 0.04386  | 0.20452  | -0.07438 | 0.05486  |
| q <sub>12</sub> | 0.02564          | 0.04005  | -0.04559 | -0.06280 | 0.06460  |
| q <sub>13</sub> | 0.02564          | 0.03766  | -0.10146 | 0.01733  | 0.04599  |
| q <sub>14</sub> | 0.02564          | 0.09205  | 0.10575  | 0.02564  | 0.02424  |
| q <sub>15</sub> | 0.02564          | -0.02495 | -0.01509 | 0.28149  | -0.00071 |
| q <sub>16</sub> | 0.02564          | -0.05255 | 0.18088  | 0.02555  | 0.02385  |
| q <sub>17</sub> | 0.02564          | 0.07575  | -0.06758 | -0.03985 | 0.04134  |
| q <sub>18</sub> | 0.02564          | -0.04742 | 0.17465  | 0.19961  | -0.00638 |
| q <sub>19</sub> | 0.02564          | 0.03353  | -0.05181 | -0.15681 | 0.06348  |
| q <sub>20</sub> | 0.02564          | 0.08997  | 0.14482  | 0.00562  | 0.02440  |
| q <sub>21</sub> | 0.02564          | 0.06738  | 0.06492  | -0.02605 | 0.03970  |
| q <sub>22</sub> | 0.02564          | 0.05697  | 0.05107  | 0.06829  | 0.04306  |
| q <sub>23</sub> | 0.02564          | -0.01660 | 0.07171  | 0.02755  | 0.00841  |
| q <sub>24</sub> | 0.02564          | 0.05581  | -0.02172 | -0.20050 | 0.06090  |
| q <sub>25</sub> | 0.02564          | 0.06605  | -0.02576 | -0.05875 | 0.03135  |
| q <sub>26</sub> | 0.02564          | 0.07770  | 0.00672  | -0.01885 | 0.03621  |
| q <sub>27</sub> | 0.02564          | 0.06138  | 0.25854  | 0.07168  | 0.02972  |
| q <sub>28</sub> | 0.02564          | 0.09664  | 0.10384  | -0.00266 | 0.03351  |
| q <sub>29</sub> | 0.02564          | 0.08487  | 0.12905  | 0.00783  | 0.02618  |
| q <sub>30</sub> | 0.02564          | 0.03042  | -0.09831 | 0.28356  | -0.02369 |
| q <sub>31</sub> | 0.02564          | -0.01182 | -0.22189 | 0.30652  | -0.00504 |
| q <sub>32</sub> | 0.02564          | -0.02330 | 0.06071  | 0.19697  | -0.02297 |
| q <sub>33</sub> | 0.02564          | 0.06598  | 0.03256  | -0.01783 | 0.04808  |
| q <sub>34</sub> | 0.02564          | 0.03583  | 0.03017  | -0.08198 | 0.06231  |
| q <sub>35</sub> | 0.02564          | -0.05983 | 0.06419  | -0.09564 | 0.02918  |
| q <sub>36</sub> | 0.02564          | 0.02712  | -0.11234 | 0.00358  | 0.03823  |
| q <sub>37</sub> | 0.02564          | -0.04624 | 0.00744  | 0.11469  | 0.00511  |
| q <sub>38</sub> | 0.02564          | 0.04909  | -0.00792 | -0.24372 | 0.05097  |
| q <sub>39</sub> | 0.02564          | 0.02095  | 0.11748  | -0.20739 | 0.06463  |
|                 | Cl <sup>0</sup>  |          |          |          |          |

|                 |          |                  |          |          |          |  |
|-----------------|----------|------------------|----------|----------|----------|--|
| q <sub>1</sub>  | n/a      | 0.02241          | -0.01406 | -0.12166 | 0.22284  |  |
| q <sub>2</sub>  | n/a      | -0.02268         | 0.07974  | -0.06183 | -0.15970 |  |
| q <sub>3</sub>  | n/a      | -0.02184         | -0.05870 | 0.01165  | -0.05419 |  |
| q <sub>4</sub>  | n/a      | 0.06324          | -0.00381 | 0.10322  | 0.13034  |  |
| q <sub>5</sub>  | n/a      | -0.00843         | 0.05230  | 0.21256  | -0.17984 |  |
| q <sub>6</sub>  | n/a      | 0.01770          | -0.02589 | -0.13269 | 0.37007  |  |
| q <sub>7</sub>  | n/a      | 0.01769          | 0.00833  | -0.17471 | 0.30072  |  |
| q <sub>8</sub>  | n/a      | -0.00105         | -0.07341 | -0.08675 | 0.04291  |  |
| q <sub>9</sub>  | n/a      | -0.01199         | -0.02565 | 0.16519  | -0.14591 |  |
| q <sub>10</sub> | n/a      | 0.02550          | 0.26321  | -0.13582 | 0.26882  |  |
| q <sub>11</sub> | n/a      | -0.01300         | -0.11169 | 0.07026  | -0.07407 |  |
| q <sub>12</sub> | n/a      | -0.01186         | 0.04590  | 0.05933  | -0.06338 |  |
| q <sub>13</sub> | n/a      | -0.01116         | 0.10216  | -0.01054 | 0.05454  |  |
| q <sub>14</sub> | n/a      | -0.02728         | -0.05775 | -0.01559 | -0.09940 |  |
| q <sub>15</sub> | n/a      | 0.02452          | 0.01519  | -0.17123 | 0.22930  |  |
| q <sub>16</sub> | n/a      | 0.05163          | -0.09878 | -0.01554 | 0.17128  |  |
| q <sub>17</sub> | n/a      | -0.02245         | 0.06804  | 0.03765  | -0.19165 |  |
| q <sub>18</sub> | n/a      | 0.04659          | -0.09538 | -0.12142 | 0.21863  |  |
| q <sub>19</sub> | n/a      | -0.00993         | 0.05217  | 0.14814  | -0.27054 |  |
| q <sub>20</sub> | n/a      | -0.02666         | -0.07908 | -0.00342 | -0.08920 |  |
| q <sub>21</sub> | n/a      | -0.01997         | -0.03545 | 0.02461  | -0.06623 |  |
| q <sub>22</sub> | n/a      | -0.01688         | -0.02789 | -0.04154 | -0.07513 |  |
| q <sub>23</sub> | n/a      | 0.01631          | -0.03916 | -0.01676 | 0.05935  |  |
| q <sub>24</sub> | n/a      | -0.01654         | 0.02187  | 0.18940  | -0.23557 |  |
| q <sub>25</sub> | n/a      | -0.01957         | 0.02593  | 0.05550  | -0.16991 |  |
| q <sub>26</sub> | n/a      | -0.02302         | -0.00367 | 0.01781  | -0.18587 |  |
| q <sub>27</sub> | n/a      | -0.01819         | -0.14119 | -0.04360 | -0.07406 |  |
| q <sub>28</sub> | n/a      | -0.02864         | -0.05670 | 0.00251  | -0.20717 |  |
| q <sub>29</sub> | n/a      | -0.02515         | -0.07047 | -0.00476 | -0.13283 |  |
| q <sub>30</sub> | n/a      | -0.00901         | 0.09899  | -0.17250 | 0.08140  |  |
| q <sub>31</sub> | n/a      | 0.01162          | 0.22342  | -0.18646 | 0.27944  |  |
| q <sub>32</sub> | n/a      | 0.02290          | -0.03315 | -0.11982 | 0.26538  |  |
| q <sub>33</sub> | n/a      | -0.01955         | -0.01778 | 0.01684  | -0.08966 |  |
| q <sub>34</sub> | n/a      | -0.01061         | -0.01647 | 0.07744  | -0.01237 |  |
| q <sub>35</sub> | n/a      | 0.05879          | -0.03505 | 0.09035  | 0.21882  |  |
| q <sub>36</sub> | n/a      | -0.00803         | 0.12419  | -0.00217 | -0.07277 |  |
| q <sub>37</sub> | n/a      | 0.04543          | -0.00406 | -0.06977 | 0.03810  |  |
| q <sub>38</sub> | n/a      | -0.01455         | 0.00797  | 0.23023  | -0.18478 |  |
| q <sub>39</sub> | n/a      | -0.00620         | -0.06415 | 0.19591  | -0.11768 |  |
|                 |          | CI <sup>1+</sup> |          |          |          |  |
| q <sub>1</sub>  | -0.02564 | 0.02281          | -0.02575 | -0.20000 | -0.09359 |  |
| q <sub>2</sub>  | -0.02564 | -0.07653         | 0.07920  | -0.10164 | -0.03642 |  |
| q <sub>3</sub>  | -0.02564 | -0.07372         | -0.10750 | 0.01233  | 0.00794  |  |

|     |                  |          |          |          |          |  |
|-----|------------------|----------|----------|----------|----------|--|
| q4  | -0.02564         | 0.06436  | -0.00698 | 0.10927  | -0.03223 |  |
| q5  | -0.02564         | -0.02846 | 0.05194  | 0.22500  | 0.03194  |  |
| q6  | -0.02564         | 0.01802  | -0.04741 | -0.21813 | -0.09084 |  |
| q7  | -0.02564         | 0.01801  | 0.00828  | -0.28721 | -0.10364 |  |
| q8  | -0.02564         | -0.00357 | -0.13443 | -0.14261 | -0.05233 |  |
| q9  | -0.02564         | -0.04045 | -0.04698 | 0.17487  | 0.03935  |  |
| q10 | -0.02564         | 0.02596  | 0.26140  | -0.22328 | -0.08111 |  |
| q11 | -0.02564         | -0.04386 | -0.20452 | 0.07438  | 0.01143  |  |
| q12 | -0.02564         | -0.04005 | 0.04559  | 0.06280  | 0.01691  |  |
| q13 | -0.02564         | -0.03766 | 0.10146  | -0.01733 | -0.01770 |  |
| q14 | -0.02564         | -0.09205 | -0.10575 | -0.02564 | -0.01542 |  |
| q15 | -0.02564         | 0.02495  | 0.01509  | -0.28149 | -0.09855 |  |
| q16 | -0.02564         | 0.05255  | -0.18088 | -0.02555 | -0.03373 |  |
| q17 | -0.02564         | -0.07575 | 0.06758  | 0.03985  | 0.00377  |  |
| q18 | -0.02564         | 0.04742  | -0.17465 | -0.19961 | -0.09893 |  |
| q19 | -0.02564         | -0.03353 | 0.05181  | 0.15681  | 0.03043  |  |
| q20 | -0.02564         | -0.08997 | -0.14482 | -0.00562 | -0.01754 |  |
| q21 | -0.02564         | -0.06738 | -0.06492 | 0.02605  | 0.00471  |  |
| q22 | -0.02564         | -0.05697 | -0.05107 | -0.06829 | -0.01896 |  |
| q23 | -0.02564         | 0.01660  | -0.07171 | -0.02755 | -0.07005 |  |
| q24 | -0.02564         | -0.05581 | 0.02172  | 0.20050  | 0.02457  |  |
| q25 | -0.02564         | -0.06605 | 0.02576  | 0.05875  | -0.00850 |  |
| q26 | -0.02564         | -0.07770 | -0.00672 | 0.01885  | 0.00835  |  |
| q27 | -0.02564         | -0.06138 | -0.25854 | -0.07168 | -0.01112 |  |
| q28 | -0.02564         | -0.09664 | -0.10384 | 0.00266  | 0.00587  |  |
| q29 | -0.02564         | -0.08487 | -0.12905 | -0.00783 | -0.01618 |  |
| q30 | -0.02564         | -0.03042 | 0.09831  | -0.28356 | -0.09133 |  |
| q31 | -0.02564         | 0.01182  | 0.22189  | -0.30652 | -0.10467 |  |
| q32 | -0.02564         | 0.02330  | -0.06071 | -0.19697 | -0.08405 |  |
| q33 | -0.02564         | -0.06598 | -0.03256 | 0.01783  | 0.00366  |  |
| q34 | -0.02564         | -0.03583 | -0.03017 | 0.08198  | 0.03067  |  |
| q35 | -0.02564         | 0.05983  | -0.06419 | 0.09564  | -0.03639 |  |
| q36 | -0.02564         | -0.02712 | 0.11234  | -0.00358 | -0.00753 |  |
| q37 | -0.02564         | 0.04624  | -0.00744 | -0.11469 | -0.08646 |  |
| q38 | -0.02564         | -0.04909 | 0.00792  | 0.24372  | 0.04337  |  |
| q39 | -0.02564         | -0.02095 | -0.11748 | 0.20739  | 0.04439  |  |
|     | Cl <sup>2+</sup> |          |          |          |          |  |
| q1  | -0.05128         | 0.04562  | -0.05150 | -0.39999 | 0.33902  |  |
| q2  | -0.05128         | -0.15307 | 0.15840  | -0.20329 | -0.22044 |  |
| q3  | -0.05128         | -0.14744 | -0.21500 | 0.02467  | -0.07945 |  |
| q4  | -0.05128         | 0.12873  | -0.01397 | 0.21854  | 0.19656  |  |
| q5  | -0.05128         | -0.05693 | 0.10389  | 0.45001  | -0.28066 |  |
| q6  | -0.05128         | 0.03604  | -0.09483 | -0.43626 | 0.52121  |  |

|     |          |          |          |          |          |
|-----|----------|----------|----------|----------|----------|
| q7  | -0.05128 | 0.03602  | 0.01656  | -0.57442 | 0.35827  |
| q8  | -0.05128 | -0.00714 | -0.26886 | -0.28522 | -0.03233 |
| q9  | -0.05128 | -0.08091 | -0.09396 | 0.34974  | -0.37801 |
| q10 | -0.05128 | 0.05192  | 0.52281  | -0.44656 | 0.29390  |
| q11 | -0.05128 | -0.08773 | -0.40904 | 0.14877  | -0.10531 |
| q12 | -0.05128 | -0.08010 | 0.09118  | 0.12561  | -0.26825 |
| q13 | -0.05128 | -0.07533 | 0.20293  | -0.03466 | 0.03227  |
| q14 | -0.05128 | -0.18411 | -0.21150 | -0.05128 | -0.31749 |
| q15 | -0.05128 | 0.04991  | 0.03019  | -0.56298 | 0.27189  |
| q16 | -0.05128 | 0.10511  | -0.36177 | -0.05110 | 0.31694  |
| q17 | -0.05128 | -0.15151 | 0.13516  | 0.07971  | -0.31097 |
| q18 | -0.05128 | 0.09485  | -0.34931 | -0.39922 | 0.23307  |
| q19 | -0.05128 | -0.06707 | 0.10362  | 0.31363  | -0.38325 |
| q20 | -0.05128 | -0.17995 | -0.28964 | -0.01125 | -0.13421 |
| q21 | -0.05128 | -0.13477 | -0.12985 | 0.05210  | -0.17795 |
| q22 | -0.05128 | -0.11394 | -0.10215 | -0.13658 | -0.05687 |
| q23 | -0.05128 | 0.03320  | -0.14342 | -0.05511 | -0.29875 |
| q24 | -0.05128 | -0.11163 | 0.04345  | 0.40100  | -0.36550 |
| q25 | -0.05128 | -0.13210 | 0.05152  | 0.11750  | -0.32154 |
| q26 | -0.05128 | -0.15541 | -0.01344 | 0.03770  | -0.21742 |
| q27 | -0.05128 | -0.12277 | -0.51709 | -0.14336 | -0.21230 |
| q28 | -0.05128 | -0.19329 | -0.20768 | 0.00533  | -0.38048 |
| q29 | -0.05128 | -0.16975 | -0.25811 | -0.01566 | -0.25043 |
| q30 | -0.05128 | -0.06085 | 0.19662  | -0.56713 | 0.00594  |
| q31 | -0.05128 | 0.02365  | 0.44379  | -0.61305 | 0.33145  |
| q32 | -0.05128 | 0.04661  | -0.12142 | -0.39394 | 0.36638  |
| q33 | -0.05128 | -0.13196 | -0.06513 | 0.03567  | -0.10962 |
| q34 | -0.05128 | -0.07166 | -0.06034 | 0.16396  | -0.00949 |
| q35 | -0.05128 | 0.11967  | -0.12839 | 0.19129  | 0.29467  |
| q36 | -0.05128 | -0.05424 | 0.22468  | -0.00716 | -0.12032 |
| q37 | -0.05128 | 0.09248  | -0.01488 | -0.22938 | -0.03576 |
| q38 | -0.05128 | -0.09819 | 0.01584  | 0.48744  | -0.31500 |
| q39 | -0.05128 | -0.04190 | -0.23497 | 0.41478  | -0.17971 |

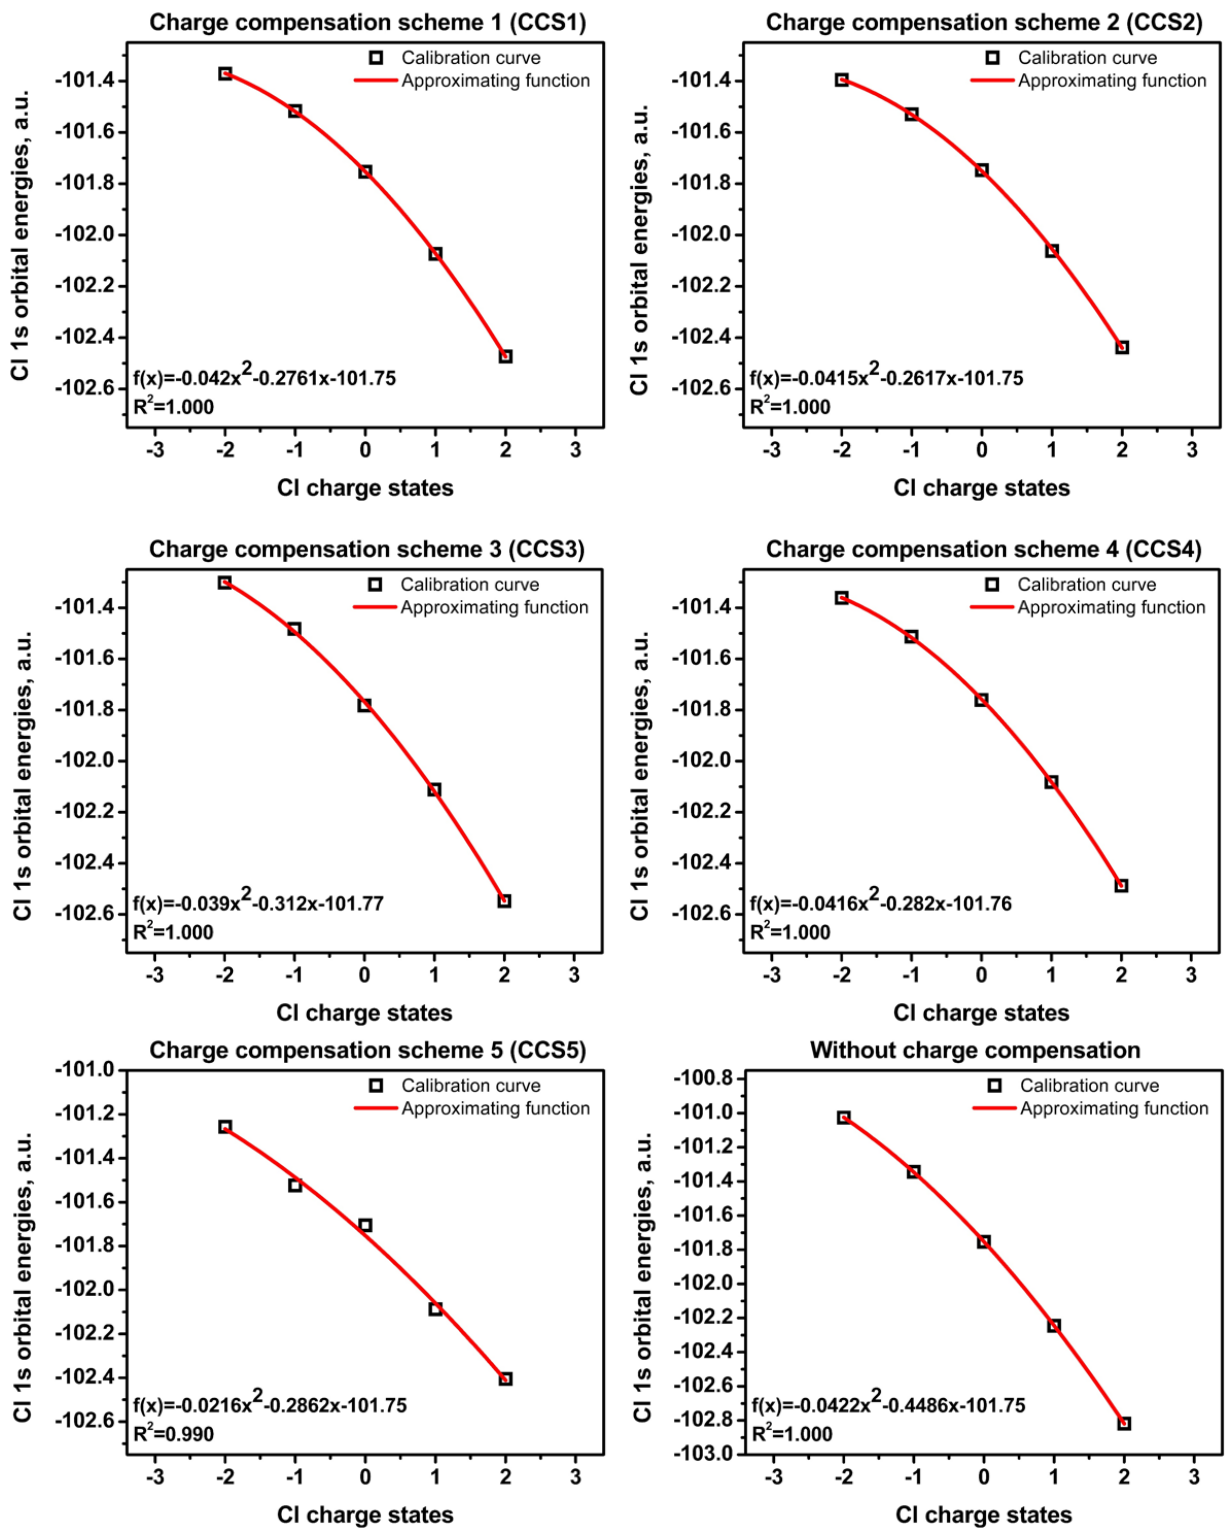

**Figure S1.** Calibration curves and equations of approximating functions obtained for tested charge compensation schemes (CCS1 – CCS5).



**Table S2.** Values of Cl 1s orbital energies ( $\varepsilon_{1s}^{Cl}$ ) accessed without (w/o CCS) and with various charge compensation schemes (CCS1-CCS5), corrections to electrostatic potentials ( $\varphi_{el}$ ) as well as predicted charge ( $Q_{Cl}$ ) on encapsulated fragment obtained within framework of different CCS for Cl@B<sub>39</sub> system.<sup>a</sup> Energies in hartrees and charges in electrons.

| Compensation scheme |                                 | Charge states |           |           |           |           | $Q_{Cl}$ predicted |
|---------------------|---------------------------------|---------------|-----------|-----------|-----------|-----------|--------------------|
|                     |                                 | -2            | -1        | 0         | 1         | 2         |                    |
| w/o CCS             | $\varepsilon_{1s}^{Cl}$ , a. u. | -101.0261     | -101.3441 | -101.7538 | -102.2460 | -102.8180 | -0.279             |
| CCS1                | $\varepsilon_{1s}^{Cl}$ , a. u. | -101.3710     | -101.5166 | -101.7538 | -102.0735 | -102.4730 | -0.475             |
|                     | $\varphi_{el}$ , a. u.          | 0.3449        | 0.1725    | 0.0000    | -0.1725   | -0.3450   |                    |
| CCS2                | $\varepsilon_{1s}^{Cl}$ , a. u. | -101.3956     | -101.5291 | -101.7472 | -102.0620 | -102.4377 | -0.506             |
|                     | $\varphi_{el}$ , a. u.          | 0.3695        | 0.1850    | -0.0065   | -0.1840   | -0.3803   |                    |
| CCS3                | $\varepsilon_{1s}^{Cl}$ , a. u. | -101.3019     | -101.4828 | -101.7824 | -102.1112 | -102.5479 | -0.483             |
|                     | $\varphi_{el}$ , a. u.          | 0.2758        | 0.1387    | 0.0287    | -0.1349   | -0.2701   |                    |
| CCS4                | $\varepsilon_{1s}^{Cl}$ , a. u. | -101.3618     | -101.5135 | -101.7605 | -102.0818 | -102.4879 | -0.505             |
|                     | $\varphi_{el}$ , a. u.          | 0.3358        | 0.1695    | 0.0068    | -0.1643   | -0.3301   |                    |
| CCS5                | $\varepsilon_{1s}^{Cl}$ , a. u. | -101.2566     | -101.5237 | -101.7055 | -102.0873 | -102.4057 | -0.440             |
|                     | $\varphi_{el}$ , a. u.          | 0.2306        | 0.1796    | -0.0483   | -0.1587   | -0.4123   |                    |

<sup>a</sup>Cl 1s orbital energy for Cl@B<sub>39</sub> complex is -101.62826 a.u.

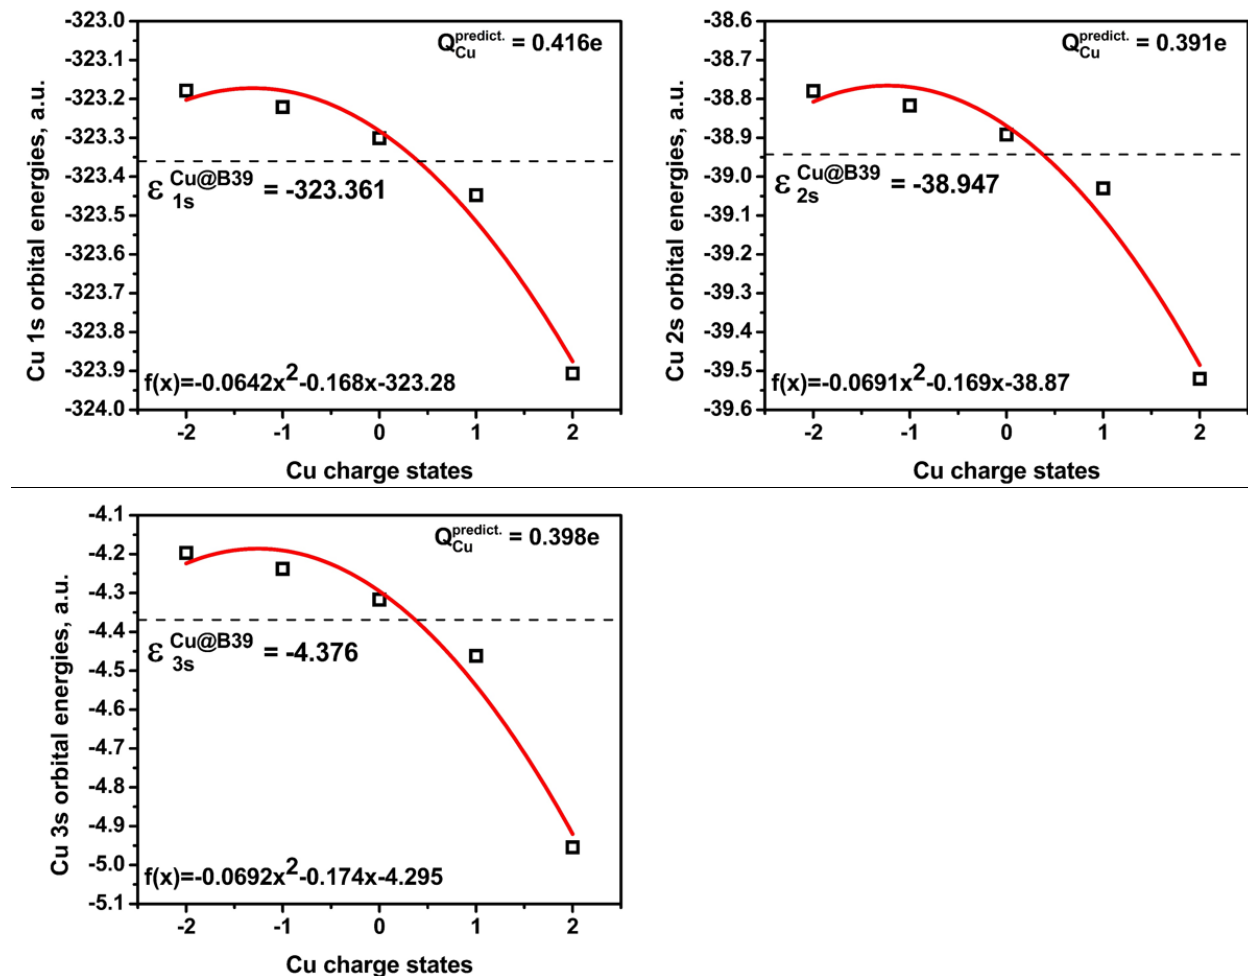

**Figure S2.** Calibration curves and equations of approximating functions constructed for charge prediction on central Cu fragment in Cu@B<sub>39</sub> complex based on 1s, 2s, and 3s orbital energies. (Cu 1s, 2s, and 3s orbital energy in complex of interest is -323.361 a.u., -38.947 a.u., and -4.376 a.u. correspondently).

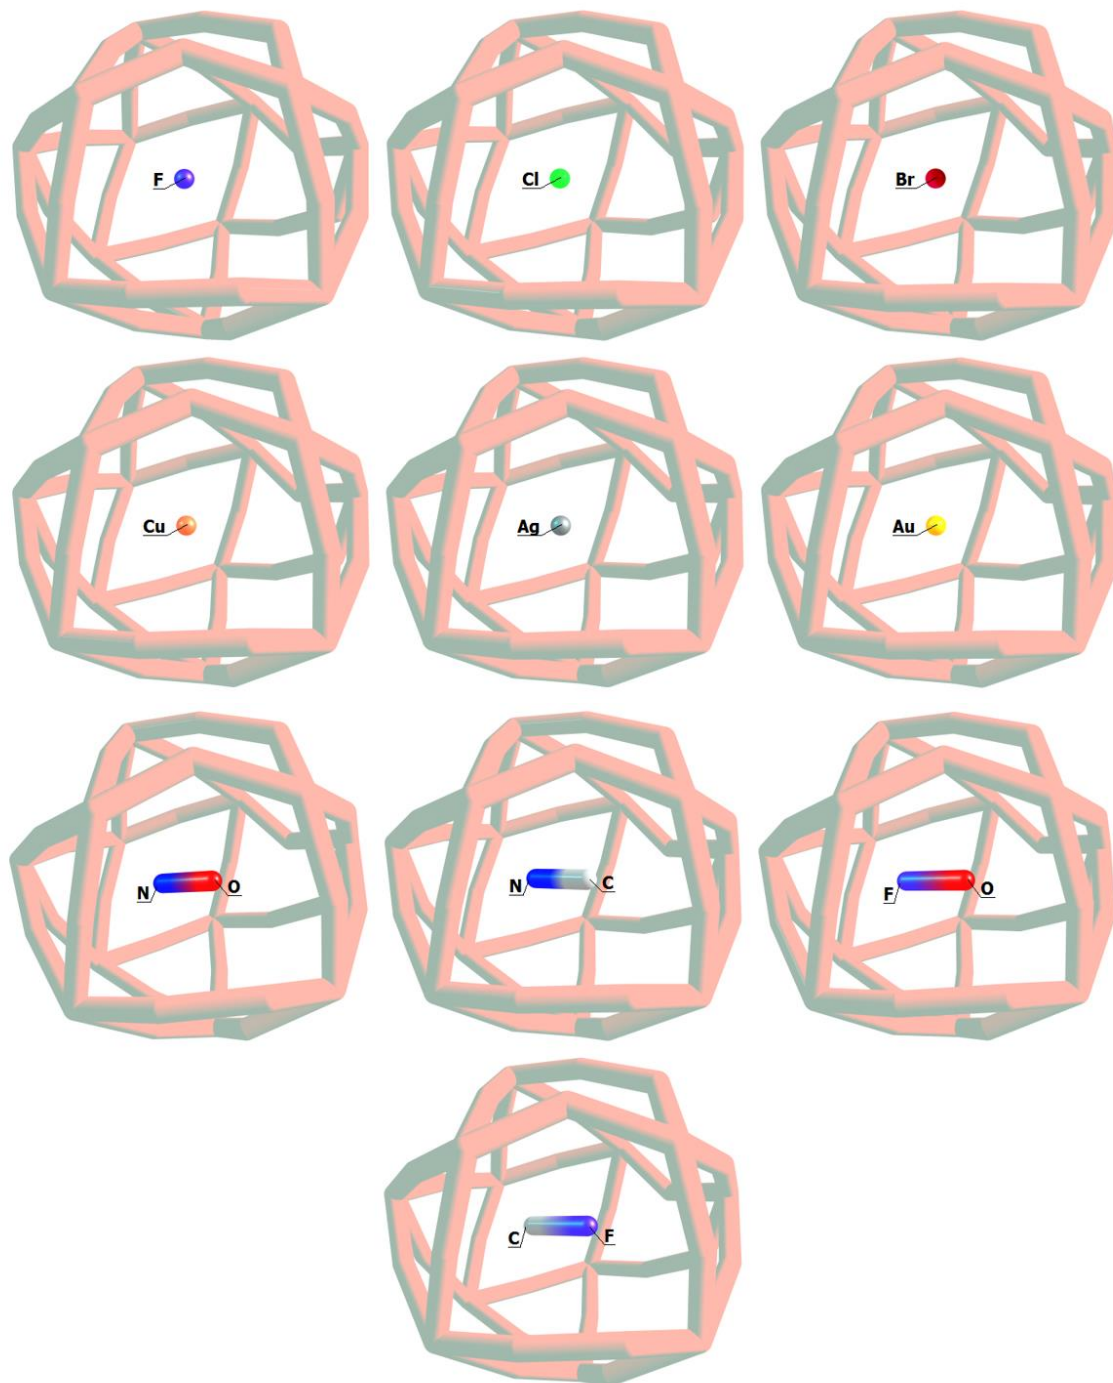

**Figure S3.** Graphical representations X@B<sub>39</sub> type of systems investigated in present work.

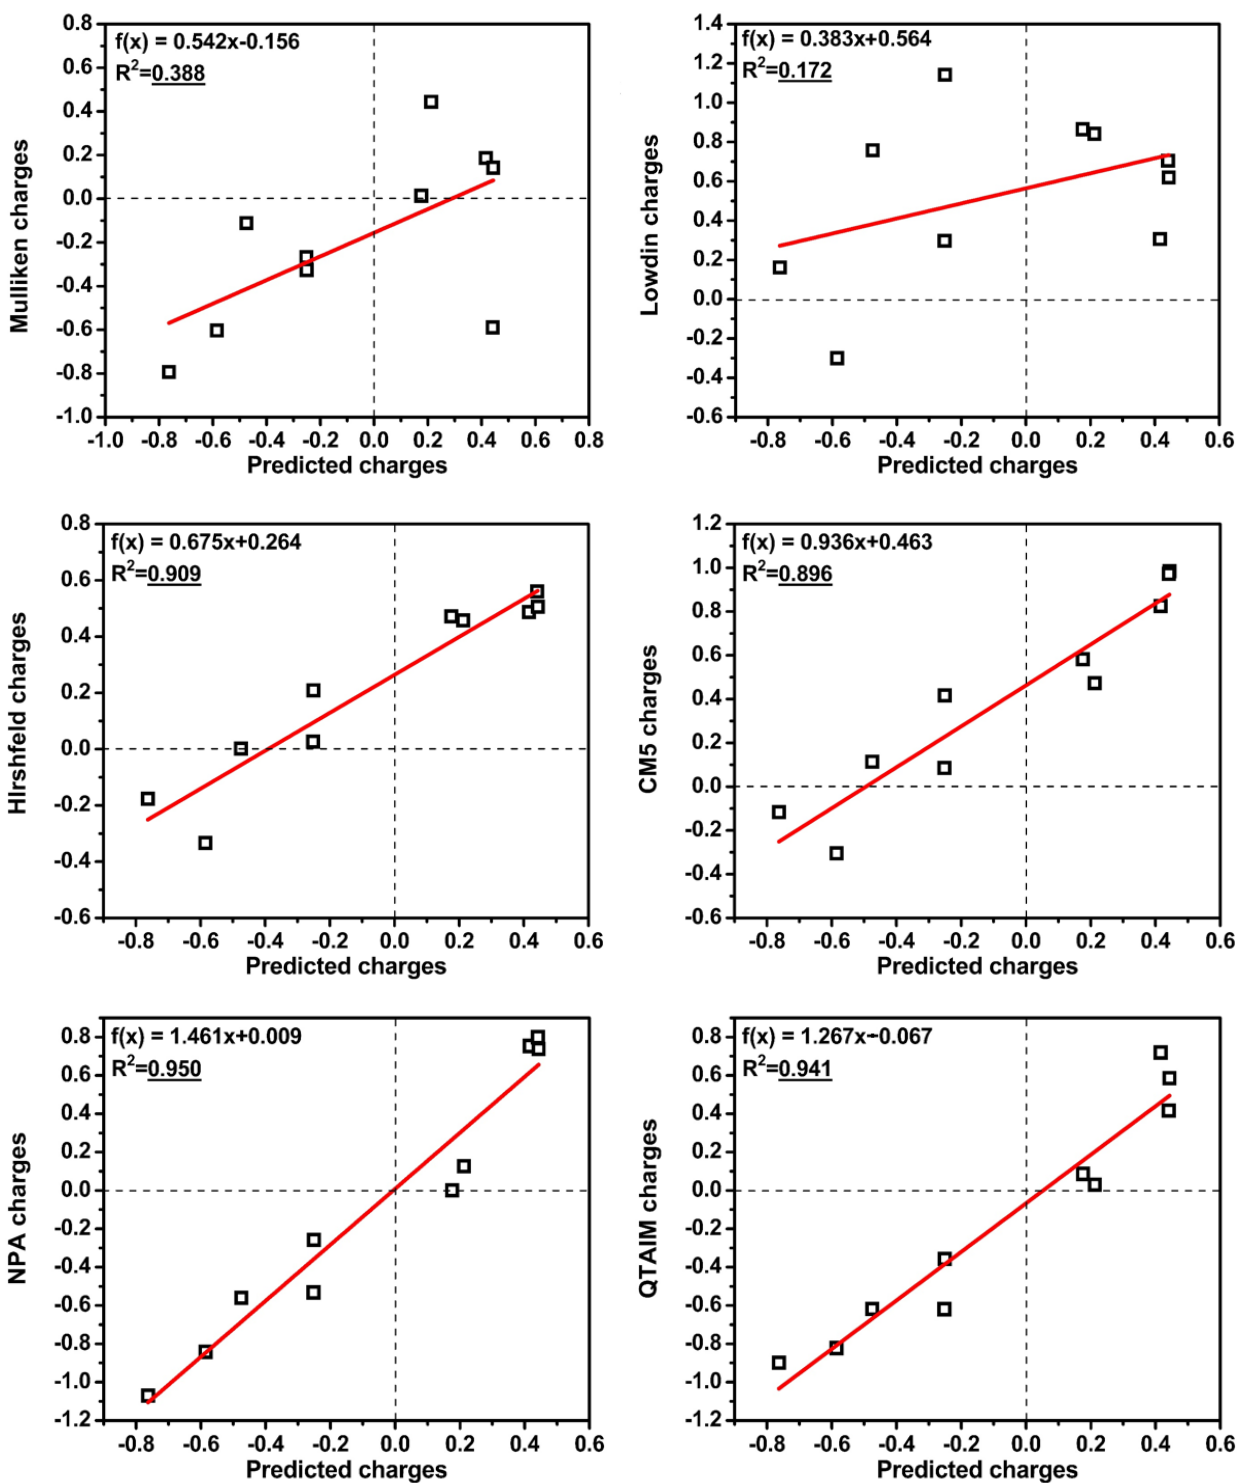

**Figure S4.** Correlations of the Mulliken, Löwdin, Hirshfeld, CM5, NPA, and QTAIM charges (in electrons) with the results obtained by the proposed method.

**Table S3.** Slope ( $\alpha$ ), intercept ( $\beta$ ), residual sum of squares (RSS) and R-square ( $R^2$ ) values for linear correlations of the Mulliken, Löwdin, Hirshfeld, CM5, NPA, and QTAIM charges with the results obtained by the proposed method.

| Charge scheme | $\alpha$ | $\beta$  | RSS     | $R^2$  |
|---------------|----------|----------|---------|--------|
| Mulliken      | 0.54163  | -0.15564 | 0.86976 | 0.3875 |
| Löwdin        | 0.38298  | 0.56413  | 1.32758 | 0.1716 |
| Hirshfeld     | 0.67453  | 0.26404  | 0.08489 | 0.9094 |
| CM5           | 0.93576  | 0.4627   | 0.19055 | 0.8960 |
| NPA           | 1.46096  | 0.00891  | 0.21053 | 0.9500 |
| QTAIM         | 1.26675  | -0.06688 | 0.19125 | 0.9402 |

Cartesian coordinates (in Å) for the studied molecules.

| Cl@B <sub>39</sub> |            |            |            | (B <sub>39</sub> +Cl) VdW |            |            |            |
|--------------------|------------|------------|------------|---------------------------|------------|------------|------------|
| Atom               | X          | Y          | Z          | Atom                      | X          | Y          | Z          |
| B                  | -0.8525729 | 1.6461958  | -2.7756007 | B                         | -0.8525729 | 1.6461958  | -2.7756007 |
| B                  | -2.9197072 | 0.2090433  | 0.7349996  | B                         | -2.9197072 | 0.2090433  | 0.7349996  |
| B                  | -1.1690263 | 2.3266786  | -1.3215332 | B                         | -1.1690263 | 2.3266786  | -1.3215332 |
| B                  | 1.2528336  | -2.0567483 | 2.2331331  | B                         | 1.2528336  | -2.0567483 | 2.2331331  |
| B                  | 2.3543614  | -1.5620837 | -0.2935620 | B                         | 2.3543614  | -1.5620837 | -0.2935620 |
| B                  | -0.9993609 | -1.5614477 | -2.7756007 | B                         | -0.9993609 | -1.5614477 | -2.7756007 |
| B                  | 1.7057430  | 2.5539606  | -0.8683334 | B                         | 1.7057430  | 2.5539606  | -0.8683334 |
| B                  | -0.2877726 | 1.8503051  | 2.8335002  | B                         | -0.2877726 | 1.8503051  | 2.8335002  |
| B                  | 0.1756234  | 2.8199786  | -0.2935620 | B                         | 0.1756234  | 2.8199786  | -0.2935620 |
| B                  | -1.7079580 | -2.5600143 | 0.2517388  | B                         | -1.7079580 | -2.5600143 | 0.2517388  |
| B                  | -2.1823839 | -1.5042932 | 1.3745563  | B                         | -2.1823839 | -1.5042932 | 1.3745563  |
| B                  | 0.1442372  | -1.0279238 | 3.0668471  | B                         | 0.1442372  | -1.0279238 | 3.0668471  |
| B                  | 1.2788167  | -2.6330623 | 0.7349996  | B                         | 1.2788167  | -2.6330623 | 0.7349996  |
| B                  | 0.5521702  | 0.8748793  | -3.0344143 | B                         | 0.5521702  | 0.8748793  | -3.0344143 |
| B                  | 1.3589233  | -2.7541971 | -0.8683334 | B                         | 1.3589233  | -2.7541971 | -0.8683334 |
| B                  | -1.4585249 | -1.1743710 | 2.8335002  | B                         | -1.4585249 | -1.1743710 | 2.8335002  |
| B                  | -2.0849250 | 0.9518814  | -1.9342788 | B                         | -2.0849250 | 0.9518814  | -1.9342788 |
| B                  | -3.0646663 | 0.2002364  | -0.8683334 | B                         | -3.0646663 | 0.2002364  | -0.8683334 |
| B                  | -2.5299849 | -1.2578949 | -0.2935620 | B                         | -2.5299849 | -1.2578949 | -0.2935620 |
| B                  | -1.0337529 | 0.0407537  | -3.0344143 | B                         | -1.0337529 | 0.0407537  | -3.0344143 |
| B                  | -1.4304496 | -2.1757458 | -1.3215332 | B                         | -1.4304496 | -2.1757458 | -1.3215332 |
| B                  | -0.9623267 | 0.3890488  | 3.0668471  | B                         | -0.9623267 | 0.3890488  | 3.0668471  |
| B                  | -2.4076131 | -0.0566116 | 2.2331331  | B                         | -2.4076131 | -0.0566116 | 2.2331331  |
| B                  | -0.1763784 | -2.7859879 | -0.2670527 | B                         | -0.1763784 | -2.7859879 | -0.2670527 |
| B                  | 0.2181090  | -2.2815387 | -1.9342788 | B                         | 0.2181090  | -2.2815387 | -1.9342788 |
| B                  | 1.8668160  | 1.3296573  | -1.9342788 | B                         | 1.8668160  | 1.3296573  | -1.9342788 |
| B                  | -0.2115642 | 2.6421465  | 1.3745563  | B                         | -0.2115642 | 2.6421465  | 1.3745563  |
| B                  | -2.3245470 | 1.5457422  | -0.2670527 | B                         | -2.3245470 | 1.5457422  | -0.2670527 |
| B                  | 0.4815826  | -0.9156331 | -3.0344143 | B                         | 0.4815826  | -0.9156331 | -3.0344143 |
| B                  | -1.3630584 | 2.7591422  | 0.2517388  | B                         | -1.3630584 | 2.7591422  | 0.2517388  |
| B                  | 3.0710164  | -0.1991279 | 0.2517388  | B                         | 3.0710164  | -0.1991279 | 0.2517388  |
| B                  | 1.8519339  | -0.0847480 | -2.7756007 | B                         | 1.8519339  | -0.0847480 | -2.7756007 |
| B                  | 2.5994759  | -0.1509327 | -1.3215332 | B                         | 2.5994759  | -0.1509327 | -1.3215332 |
| B                  | 0.8180895  | 0.6388750  | 3.0668471  | B                         | 0.8180895  | 0.6388750  | 3.0668471  |
| B                  | 1.1547794  | 2.1133599  | 2.2331331  | B                         | 1.1547794  | 2.1133599  | 2.2331331  |
| B                  | 1.6408905  | 2.4240189  | 0.7349996  | B                         | 1.6408905  | 2.4240189  | 0.7349996  |
| B                  | 1.7462975  | -0.6759341 | 2.8335002  | B                         | 1.7462975  | -0.6759341 | 2.8335002  |
| B                  | 2.5009255  | 1.2402456  | -0.2670527 | B                         | 2.5009255  | 1.2402456  | -0.2670527 |
| B                  | 2.3939481  | -1.1378532 | 1.3745563  | B                         | 2.3939481  | -1.1378532 | 1.3745563  |
| Cl                 | 0.0000000  | 0.0000000  | 0.0000000  | Cl                        | 0.0000000  | -3.0000000 | 0.0000000  |

X@B<sub>39</sub><sup>+</sup> (X = Cu, Ag, Au, F, Br)NO@B<sub>39</sub>

| Atom | X          | Y          | Z          | Atom | X          | Y          | Z          |
|------|------------|------------|------------|------|------------|------------|------------|
| B    | -0.8525729 | 1.6461958  | -2.7756007 | B    | -0.8525729 | 1.6461958  | -2.7756007 |
| B    | -2.9197072 | 0.2090433  | 0.7349996  | B    | -2.9197072 | 0.2090433  | 0.7349996  |
| B    | -1.1690263 | 2.3266786  | -1.3215332 | B    | -1.1690263 | 2.3266786  | -1.3215332 |
| B    | 1.2528336  | -2.0567483 | 2.2331331  | B    | 1.2528336  | -2.0567483 | 2.2331331  |
| B    | 2.3543614  | -1.5620837 | -0.2935620 | B    | 2.3543614  | -1.5620837 | -0.2935620 |
| B    | -0.9993609 | -1.5614477 | -2.7756007 | B    | -0.9993609 | -1.5614477 | -2.7756007 |
| B    | 1.7057430  | 2.5539606  | -0.8683334 | B    | 1.7057430  | 2.5539606  | -0.8683334 |
| B    | -0.2877726 | 1.8503051  | 2.8335002  | B    | -0.2877726 | 1.8503051  | 2.8335002  |
| B    | 0.1756234  | 2.8199786  | -0.2935620 | B    | 0.1756234  | 2.8199786  | -0.2935620 |
| B    | -1.7079580 | -2.5600143 | 0.2517388  | B    | -1.7079580 | -2.5600143 | 0.2517388  |
| B    | -2.1823839 | -1.5042932 | 1.3745563  | B    | -2.1823839 | -1.5042932 | 1.3745563  |
| B    | 0.1442372  | -1.0279238 | 3.0668471  | B    | 0.1442372  | -1.0279238 | 3.0668471  |
| B    | 1.2788167  | -2.6330623 | 0.7349996  | B    | 1.2788167  | -2.6330623 | 0.7349996  |
| B    | 0.5521702  | 0.8748793  | -3.0344143 | B    | 0.5521702  | 0.8748793  | -3.0344143 |
| B    | 1.3589233  | -2.7541971 | -0.8683334 | B    | 1.3589233  | -2.7541971 | -0.8683334 |
| B    | -1.4585249 | -1.1743710 | 2.8335002  | B    | -1.4585249 | -1.1743710 | 2.8335002  |
| B    | -2.0849250 | 0.9518814  | -1.9342788 | B    | -2.0849250 | 0.9518814  | -1.9342788 |
| B    | -3.0646663 | 0.2002364  | -0.8683334 | B    | -3.0646663 | 0.2002364  | -0.8683334 |
| B    | -2.5299849 | -1.2578949 | -0.2935620 | B    | -2.5299849 | -1.2578949 | -0.2935620 |
| B    | -1.0337529 | 0.0407537  | -3.0344143 | B    | -1.0337529 | 0.0407537  | -3.0344143 |
| B    | -1.4304496 | -2.1757458 | -1.3215332 | B    | -1.4304496 | -2.1757458 | -1.3215332 |
| B    | -0.9623267 | 0.3890488  | 3.0668471  | B    | -0.9623267 | 0.3890488  | 3.0668471  |
| B    | -2.4076131 | -0.0566116 | 2.2331331  | B    | -2.4076131 | -0.0566116 | 2.2331331  |
| B    | -0.1763784 | -2.7859879 | -0.2670527 | B    | -0.1763784 | -2.7859879 | -0.2670527 |
| B    | 0.2181090  | -2.2815387 | -1.9342788 | B    | 0.2181090  | -2.2815387 | -1.9342788 |
| B    | 1.8668160  | 1.3296573  | -1.9342788 | B    | 1.8668160  | 1.3296573  | -1.9342788 |
| B    | -0.2115642 | 2.6421465  | 1.3745563  | B    | -0.2115642 | 2.6421465  | 1.3745563  |
| B    | -2.3245470 | 1.5457422  | -0.2670527 | B    | -2.3245470 | 1.5457422  | -0.2670527 |
| B    | 0.4815826  | -0.9156331 | -3.0344143 | B    | 0.4815826  | -0.9156331 | -3.0344143 |
| B    | -1.3630584 | 2.7591422  | 0.2517388  | B    | -1.3630584 | 2.7591422  | 0.2517388  |
| B    | 3.0710164  | -0.1991279 | 0.2517388  | B    | 3.0710164  | -0.1991279 | 0.2517388  |
| B    | 1.8519339  | -0.0847480 | -2.7756007 | B    | 1.8519339  | -0.0847480 | -2.7756007 |
| B    | 2.5994759  | -0.1509327 | -1.3215332 | B    | 2.5994759  | -0.1509327 | -1.3215332 |
| B    | 0.8180895  | 0.6388750  | 3.0668471  | B    | 0.8180895  | 0.6388750  | 3.0668471  |
| B    | 1.1547794  | 2.1133599  | 2.2331331  | B    | 1.1547794  | 2.1133599  | 2.2331331  |
| B    | 1.6408905  | 2.4240189  | 0.7349996  | B    | 1.6408905  | 2.4240189  | 0.7349996  |
| B    | 1.7462975  | -0.6759341 | 2.8335002  | B    | 1.7462975  | -0.6759341 | 2.8335002  |
| B    | 2.5009255  | 1.2402456  | -0.2670527 | B    | 2.5009255  | 1.2402456  | -0.2670527 |
| B    | 2.3939481  | -1.1378532 | 1.3745563  | B    | 2.3939481  | -1.1378532 | 1.3745563  |
| X    | 0.0000000  | 0.0000000  | 0.0000000  | N    | 0.0000000  | 0.0000000  | 0.5698790  |
|      |            |            |            | O    | 0.0000000  | 0.0000000  | -0.5698790 |

CN@B<sub>39</sub>

| Atom | X          | Y          | Z          |
|------|------------|------------|------------|
| B    | -0.8525729 | 1.6461958  | -2.7756007 |
| B    | -2.9197072 | 0.2090433  | 0.7349996  |
| B    | -1.1690263 | 2.3266786  | -1.3215332 |
| B    | 1.2528336  | -2.0567483 | 2.2331331  |
| B    | 2.3543614  | -1.5620837 | -0.2935620 |
| B    | -0.9993609 | -1.5614477 | -2.7756007 |
| B    | 1.7057430  | 2.5539606  | -0.8683334 |
| B    | -0.2877726 | 1.8503051  | 2.8335002  |
| B    | 0.1756234  | 2.8199786  | -0.2935620 |
| B    | -1.7079580 | -2.5600143 | 0.2517388  |
| B    | -2.1823839 | -1.5042932 | 1.3745563  |
| B    | 0.1442372  | -1.0279238 | 3.0668471  |
| B    | 1.2788167  | -2.6330623 | 0.7349996  |
| B    | 0.5521702  | 0.8748793  | -3.0344143 |
| B    | 1.3589233  | -2.7541971 | -0.8683334 |
| B    | -1.4585249 | -1.1743710 | 2.8335002  |
| B    | -2.0849250 | 0.9518814  | -1.9342788 |
| B    | -3.0646663 | 0.2002364  | -0.8683334 |
| B    | -2.5299849 | -1.2578949 | -0.2935620 |
| B    | -1.0337529 | 0.0407537  | -3.0344143 |
| B    | -1.4304496 | -2.1757458 | -1.3215332 |
| B    | -0.9623267 | 0.3890488  | 3.0668471  |
| B    | -2.4076131 | -0.0566116 | 2.2331331  |
| B    | -0.1763784 | -2.7859879 | -0.2670527 |
| B    | 0.2181090  | -2.2815387 | -1.9342788 |
| B    | 1.8668160  | 1.3296573  | -1.9342788 |
| B    | -0.2115642 | 2.6421465  | 1.3745563  |
| B    | -2.3245470 | 1.5457422  | -0.2670527 |
| B    | 0.4815826  | -0.9156331 | -3.0344143 |
| B    | -1.3630584 | 2.7591422  | 0.2517388  |
| B    | 3.0710164  | -0.1991279 | 0.2517388  |
| B    | 1.8519339  | -0.0847480 | -2.7756007 |
| B    | 2.5994759  | -0.1509327 | -1.3215332 |
| B    | 0.8180895  | 0.6388750  | 3.0668471  |
| B    | 1.1547794  | 2.1133599  | 2.2331331  |
| B    | 1.6408905  | 2.4240189  | 0.7349996  |
| B    | 1.7462975  | -0.6759341 | 2.8335002  |
| B    | 2.5009255  | 1.2402456  | -0.2670527 |
| B    | 2.3939481  | -1.1378532 | 1.3745563  |
| C    | 0.0000000  | 0.0000000  | 0.5811170  |
| N    | 0.0000000  | 0.0000000  | -0.5811170 |

FO@B<sub>39</sub>

| Atom | X          | Y          | Z          |
|------|------------|------------|------------|
| B    | -0.8525729 | 1.6461958  | -2.7756007 |
| B    | -2.9197072 | 0.2090433  | 0.7349996  |
| B    | -1.1690263 | 2.3266786  | -1.3215332 |
| B    | 1.2528336  | -2.0567483 | 2.2331331  |
| B    | 2.3543614  | -1.5620837 | -0.2935620 |
| B    | -0.9993609 | -1.5614477 | -2.7756007 |
| B    | 1.7057430  | 2.5539606  | -0.8683334 |
| B    | -0.2877726 | 1.8503051  | 2.8335002  |
| B    | 0.1756234  | 2.8199786  | -0.2935620 |
| B    | -1.7079580 | -2.5600143 | 0.2517388  |
| B    | -2.1823839 | -1.5042932 | 1.3745563  |
| B    | 0.1442372  | -1.0279238 | 3.0668471  |
| B    | 1.2788167  | -2.6330623 | 0.7349996  |
| B    | 0.5521702  | 0.8748793  | -3.0344143 |
| B    | 1.3589233  | -2.7541971 | -0.8683334 |
| B    | -1.4585249 | -1.1743710 | 2.8335002  |
| B    | -2.0849250 | 0.9518814  | -1.9342788 |
| B    | -3.0646663 | 0.2002364  | -0.8683334 |
| B    | -2.5299849 | -1.2578949 | -0.2935620 |
| B    | -1.0337529 | 0.0407537  | -3.0344143 |
| B    | -1.4304496 | -2.1757458 | -1.3215332 |
| B    | -0.9623267 | 0.3890488  | 3.0668471  |
| B    | -2.4076131 | -0.0566116 | 2.2331331  |
| B    | -0.1763784 | -2.7859879 | -0.2670527 |
| B    | 0.2181090  | -2.2815387 | -1.9342788 |
| B    | 1.8668160  | 1.3296573  | -1.9342788 |
| B    | -0.2115642 | 2.6421465  | 1.3745563  |
| B    | -2.3245470 | 1.5457422  | -0.2670527 |
| B    | 0.4815826  | -0.9156331 | -3.0344143 |
| B    | -1.3630584 | 2.7591422  | 0.2517388  |
| B    | 3.0710164  | -0.1991279 | 0.2517388  |
| B    | 1.8519339  | -0.0847480 | -2.7756007 |
| B    | 2.5994759  | -0.1509327 | -1.3215332 |
| B    | 0.8180895  | 0.6388750  | 3.0668471  |
| B    | 1.1547794  | 2.1133599  | 2.2331331  |
| B    | 1.6408905  | 2.4240189  | 0.7349996  |
| B    | 1.7462975  | -0.6759341 | 2.8335002  |
| B    | 2.5009255  | 1.2402456  | -0.2670527 |
| B    | 2.3939481  | -1.1378532 | 1.3745563  |
| F    | 0.0000000  | 0.0000000  | -0.6743775 |
| O    | 0.0000000  | 0.0000000  | 0.6743775  |



CF@B<sub>39</sub>Sc<sub>3</sub>N@I<sub>h</sub>-C<sub>80</sub>

| Atom | X          | Y          | Z          | Atom | X          | Y          | Z          |
|------|------------|------------|------------|------|------------|------------|------------|
| B    | -0.8525729 | 1.6461958  | -2.7756007 | C    | 2.0969437  | 0.3049768  | 0.3301716  |
| B    | -2.9197072 | 0.2090433  | 0.7349996  | C    | -0.8556314 | -1.4574183 | 0.8355135  |
| B    | -1.1690263 | 2.3266786  | -1.3215332 | C    | -0.7048720 | 1.0165015  | -1.5965134 |
| B    | 1.2528336  | -2.0567483 | 2.2331331  | C    | 0.1854454  | -0.0588864 | -0.1565573 |
| B    | 2.3543614  | -1.5620837 | -0.2935620 | C    | -3.1511421 | 2.3855960  | -0.2307880 |
| B    | -0.9993609 | -1.5614477 | -2.7756007 | C    | -3.5857610 | 1.2805242  | -1.0062417 |
| B    | 1.7057430  | 2.5539606  | -0.8683334 | C    | -3.0672152 | 1.1729197  | -2.3481687 |
| B    | -0.2877726 | 1.8503051  | 2.8335002  | C    | 4.0701106  | -0.0254233 | -1.3119469 |
| B    | 0.1756234  | 2.8199786  | -0.2935620 | C    | -2.9799369 | 2.2907628  | 1.1869176  |
| B    | -1.7079580 | -2.5600143 | 0.2517388  | C    | -2.4053564 | 0.7393536  | 2.9755701  |
| B    | -2.1823839 | -1.5042932 | 1.3745563  | C    | -3.2258515 | 1.0592857  | 1.8601897  |
| B    | 0.1442372  | -1.0279238 | 3.0668471  | C    | -3.7390658 | -0.0268086 | 1.0955989  |
| B    | 1.2788167  | -2.6330623 | 0.7349996  | C    | -3.6741027 | -1.2097291 | -0.9055681 |
| B    | 0.5521702  | 0.8748793  | -3.0344143 | C    | -3.0688530 | -1.3421964 | -2.1836253 |
| B    | 1.3589233  | -2.7541971 | -0.8683334 | C    | -2.7809651 | -0.1274230 | -2.8896550 |
| B    | -1.4585249 | -1.1743710 | 2.8335002  | C    | -2.2112803 | -2.4448714 | -2.4182447 |
| B    | -2.0849250 | 0.9518814  | -1.9342788 | C    | -3.3385882 | -2.1208759 | 0.1539609  |
| B    | -3.0646663 | 0.2002364  | -0.8683334 | C    | -1.6347107 | -3.6221916 | 1.0894725  |
| B    | -2.5299849 | -1.2578949 | -0.2935620 | C    | -2.4312531 | -3.2092200 | -0.0470873 |
| B    | -1.0337529 | 0.0407537  | -3.0344143 | C    | -1.8804602 | -3.3585724 | -1.3575576 |
| B    | -1.4304496 | -2.1757458 | -1.3215332 | C    | -2.0478336 | -0.6242847 | 3.2702823  |
| B    | -0.9623267 | 0.3890488  | 3.0668471  | C    | -2.5461376 | -1.7328926 | 2.5135159  |
| B    | -2.4076131 | -0.0566116 | 2.2331331  | C    | -3.3856440 | -1.3898260 | 1.4023644  |
| B    | -0.1763784 | -2.7859879 | -0.2670527 | C    | -1.6950898 | -2.9047558 | 2.3714562  |
| B    | 0.2181090  | -2.2815387 | -1.9342788 | C    | 0.6440761  | 2.7548889  | -3.0946401 |
| B    | 1.8668160  | 1.3296573  | -1.9342788 | C    | 0.1649084  | 1.6554899  | -3.8751922 |
| B    | -0.2115642 | 2.6421465  | 1.3745563  | C    | -1.6567153 | -0.0122449 | -3.7672458 |
| B    | -2.3245470 | 1.5457422  | -0.2670527 | C    | -1.2546842 | 1.3762374  | -3.8186689 |
| B    | 0.4815826  | -0.9156331 | -3.0344143 | C    | -0.2260727 | 3.4906334  | -2.2018242 |
| B    | -1.3630584 | 2.7591422  | 0.2517388  | C    | -2.1522638 | 3.2921474  | -0.7480052 |
| B    | 3.0710164  | -0.1991279 | 0.2517388  | C    | -1.6197680 | 3.1772077  | -2.0723874 |
| B    | 1.8519339  | -0.0847480 | -2.7756007 | C    | -2.1539380 | 2.1364213  | -2.9382857 |
| B    | 2.5994759  | -0.1509327 | -1.3215332 | C    | 0.8747517  | 3.7700913  | 1.3296367  |
| B    | 0.8180895  | 0.6388750  | 3.0668471  | C    | 0.0188951  | 4.0374702  | 0.2221900  |
| B    | 1.1547794  | 2.1133599  | 2.2331331  | C    | 0.5710388  | 3.9350967  | -1.0863159 |
| B    | 1.6408905  | 2.4240189  | 0.7349996  | C    | -1.3642488 | 3.7460370  | 0.3689252  |
| B    | 1.7462975  | -0.6759341 | 2.8335002  | C    | 2.0129806  | -0.0143059 | 3.5353222  |
| B    | 2.5009255  | 1.2402456  | -0.2670527 | C    | 0.1759922  | -1.6790262 | 3.6004766  |
| B    | 2.3939481  | -1.1378532 | 1.3745563  | C    | 1.5640734  | -1.3754742 | 3.4915507  |
| C    | 0.0000000  | 0.0000000  | 0.6341220  | C    | -0.3294687 | -2.8067019 | 2.8562794  |
| F    | 0.0000000  | 0.0000000  | -0.6341220 | C    | 3.1668938  | 0.1049220  | 2.6796571  |
|      |            |            |            | C    | 4.1497468  | 1.2010457  | 0.6981333  |
|      |            |            |            | C    | 3.4877624  | 1.3204794  | 1.9888808  |
|      |            |            |            | C    | 2.5550775  | 2.3918263  | 2.1715929  |
|      |            |            |            | C    | 3.4914920  | -2.4364242 | -0.0040667 |

|    |            |            |            |
|----|------------|------------|------------|
| C  | 3.9609163  | -1.3375940 | 0.7799342  |
| C  | 3.4117622  | -1.1959540 | 2.0936077  |
| C  | 4.3646248  | -0.1248302 | 0.1003711  |
| C  | 0.5381600  | -3.4895613 | 1.9361370  |
| C  | 1.9235526  | -3.1528399 | 1.7814525  |
| C  | 2.4206992  | -2.1043079 | 2.6005526  |
| C  | 2.4957439  | -3.3437242 | 0.4999793  |
| C  | -0.2513414 | -3.9651280 | 0.8414437  |
| C  | -0.5301694 | -3.8123505 | -1.5761533 |
| C  | 0.3237184  | -4.0796165 | -0.4744508 |
| C  | 1.7095703  | -3.8005934 | -0.6120346 |
| C  | 3.6957714  | 2.0695012  | -0.3745106 |
| C  | 2.7409987  | 3.1351193  | -0.1907745 |
| C  | 2.2141440  | 3.3148294  | 1.1137269  |
| C  | 1.9192370  | 3.4946433  | -1.2981597 |
| C  | 0.3738066  | 3.1262771  | 2.5089263  |
| C  | -0.9986374 | 2.7581959  | 2.6209109  |
| C  | -1.8716780 | 3.1227555  | 1.5549540  |
| C  | -1.3105969 | 1.5799483  | 3.3595553  |
| C  | 1.4063256  | 2.2834071  | 3.0338548  |
| C  | -0.7218057 | -0.6084096 | 3.8432490  |
| C  | 1.0987100  | 1.0652075  | 3.6980641  |
| C  | -0.2755195 | 0.7499932  | 3.9036674  |
| C  | 3.6881855  | 1.3225724  | -1.6025747 |
| C  | 2.3894448  | 0.5715678  | -3.5169921 |
| C  | 2.8246503  | 1.6445961  | -2.7012547 |
| C  | 1.9660211  | 2.7632338  | -2.5317233 |
| C  | 3.3139975  | -2.3402976 | -1.4307539 |
| C  | 2.7503371  | -0.7876862 | -3.2247388 |
| C  | 3.5582495  | -1.1146615 | -2.1032017 |
| C  | -3.9252500 | 0.0770300  | -0.3225307 |
| C  | -0.0311178 | -3.1797283 | -2.7590616 |
| C  | 1.6560573  | -1.6336147 | -3.6083165 |
| C  | 1.3405657  | -2.8079269 | -2.8653664 |
| C  | 2.2148086  | -3.1781069 | -1.8027518 |
| Sc | -1.0685179 | -2.3364308 | -3.2815379 |
| Sc | 1.0675951  | 0.5671618  | -4.0841091 |
| Sc | -0.7484115 | -1.1175925 | -3.9368607 |
| N  | 0.6201275  | -0.8012561 | -4.1403934 |

**General description of calibration curves construction for charge assessment on encapsulated fragment for X@YY endohedral system.**

1. At the initial stage, 1s orbital energies for encapsulated fragment X taken in various charge states has been obtained.
2. At the next stage calibration curve of 1s orbital energy on charge state for specie of interest has been constructed.
3. Charge prediction is performed on the basis of the calibration curve obtained above and the 1s orbital energy value for encapsulated fragment X in X@YY system.

In the case when encapsulated fragment represented by a group of atoms calibration curve as well as charge prediction can be performed for any of the atoms constituting the fragment X.

| Cl+B39 (VdW) [0,1] |         | Mulliken Scheme | Lowdin Scheme  | Hirshfeld Scheme | CM5 Scheme     | NPA Scheme     | Bader Scheme   |
|--------------------|---------|-----------------|----------------|------------------|----------------|----------------|----------------|
| Atom Number        | Element | Charge density  | Charge density | Charge density   | Charge density | Charge density | Charge density |
| 1                  | B       | 0.1732          | 0.0198         | -0.0696          | -0.0696        | -0.1962        | 6.93E-02       |
| 2                  | B       | 0.0095          | 0.0017         | 0.0185           | 0.0185         | 0.0339         | 1.23E-01       |
| 3                  | B       | -0.0488         | -0.0309        | 0.0229           | 0.0229         | 0.0455         | -5.73E-02      |
| 4                  | B       | 0.1000          | 0.0544         | 0.0062           | 0.0061         | 0.0318         | 4.76E-03       |
| 5                  | B       | -0.1612         | 0.0044         | 0.0537           | 0.0537         | 0.1528         | 2.27E-02       |
| 6                  | B       | 0.2034          | 0.0187         | -0.0707          | -0.0707        | -0.2103        | 4.55E-02       |
| 7                  | B       | 0.2119          | 0.0198         | -0.0647          | -0.0647        | -0.2076        | 3.31E-02       |
| 8                  | B       | 0.2114          | 0.0434         | 0.0015           | 0.0010         | -0.0506        | 5.69E-02       |
| 9                  | B       | -0.2075         | -0.0062        | 0.0465           | 0.0465         | 0.1178         | -1.64E-02      |
| 10                 | B       | 0.0958          | 0.0150         | -0.0642          | -0.0642        | -0.2009        | 2.18E-01       |
| 11                 | B       | -0.1235         | -0.0058        | 0.0427           | 0.0427         | 0.0863         | -1.73E-01      |
| 12                 | B       | -0.1158         | -0.0415        | 0.0639           | 0.0617         | 0.1323         | 3.95E-02       |
| 13                 | B       | 0.0690          | -0.0135        | 0.0074           | 0.0074         | -0.0241        | 5.66E-02       |
| 14                 | B       | -0.0317         | -0.0014        | 0.0380           | 0.0380         | 0.1070         | -4.51E-02      |
| 15                 | B       | 0.2076          | 0.0256         | -0.0630          | -0.0630        | -0.2011        | 2.01E-02       |
| 16                 | B       | 0.2185          | 0.0359         | -0.0047          | -0.0052        | -0.0855        | -6.48E-02      |
| 17                 | B       | -0.0918         | -0.0113        | 0.0379           | 0.0379         | 0.1044         | 4.77E-02       |
| 18                 | B       | 0.1784          | 0.0214         | -0.0669          | -0.0669        | -0.2240        | -8.79E-02      |
| 19                 | B       | -0.1421         | -0.0046        | 0.0471           | 0.0471         | 0.1285         | 3.77E-02       |
| 20                 | B       | -0.0280         | -0.0043        | 0.0372           | 0.0372         | 0.1097         | -7.76E-02      |
| 21                 | B       | -0.0481         | -0.0247        | 0.0276           | 0.0276         | 0.0684         | -3.17E-02      |
| 22                 | B       | -0.0271         | -0.0069        | 0.0764           | 0.0742         | 0.1845         | 8.52E-02       |
| 23                 | B       | 0.0551          | 0.0599         | 0.0053           | 0.0052         | 0.0345         | 5.87E-02       |
| 24                 | B       | -0.2079         | -0.0147        | 0.0442           | 0.0442         | 0.1290         | -1.57E-02      |
| 25                 | B       | -0.0684         | -0.0036        | 0.0404           | 0.0404         | 0.1230         | 3.87E-02       |
| 26                 | B       | -0.0909         | -0.0052        | 0.0372           | 0.0372         | 0.1016         | 1.17E-02       |
| 27                 | B       | -0.0217         | 0.0276         | 0.0503           | 0.0503         | 0.1184         | -1.44E-01      |
| 28                 | B       | -0.1593         | 0.0019         | 0.0490           | 0.0490         | 0.1477         | 1.24E-03       |
| 29                 | B       | -0.0489         | -0.0031        | 0.0371           | 0.0371         | 0.1051         | -4.42E-02      |
| 30                 | B       | 0.1305          | 0.0155         | -0.0616          | -0.0616        | -0.1862        | 2.07E-01       |
| 31                 | B       | 0.1451          | 0.0156         | -0.0678          | -0.0678        | -0.2367        | 1.86E-01       |
| 32                 | B       | 0.2000          | 0.0206         | -0.0678          | -0.0678        | -0.1985        | 3.18E-02       |
| 33                 | B       | -0.0073         | -0.0195        | 0.0297           | 0.0297         | 0.0704         | -2.06E-02      |
| 34                 | B       | -0.1594         | -0.0394        | 0.0637           | 0.0615         | 0.1390         | 9.79E-03       |
| 35                 | B       | 0.1026          | 0.0413         | -0.0014          | -0.0014        | -0.0065        | -2.78E-02      |
| 36                 | B       | 0.0317          | -0.0113        | 0.0081           | 0.0081         | -0.0022        | 7.22E-02       |
| 37                 | B       | 0.2404          | 0.0417         | -0.0033          | -0.0040        | -0.0677        | 6.65E-02       |
| 38                 | B       | -0.2416         | -0.0090        | 0.0528           | 0.0528         | 0.1665         | -2.02E-02      |
| 39                 | B       | -0.1435         | 0.0117         | 0.0543           | 0.0543         | 0.1401         | -1.38E-01      |
| 40                 | Cl      | -0.4098         | -0.2392        | -0.3935          | -0.3851        | -0.4803        | -5.47E-01      |
| F1(B39)            |         | 0.4098          | 0.2392         | 0.3935           | 0.3851         | 0.4803         | 0.580          |
| F2(Cl)             |         | -0.4098         | -0.2392        | -0.3935          | -0.3851        | -0.4803        | -0.547         |
| Total              |         | 0.0000          | 0.0000         | 0.0000           | 0.0000         | 0.0000         | 0.033          |

| F@B39 [0,1] |         | Mulliken Scheme | Lowdin Scheme  | Hirshfeld Scheme | CM5 Scheme     | NPA Scheme     | Bader Scheme   |
|-------------|---------|-----------------|----------------|------------------|----------------|----------------|----------------|
| Atom Number | Element | Charge density  | Charge density | Charge density   | Charge density | Charge density | Charge density |
| 1           | B       | 0.1870          | 0.0150         | -0.0751          | -0.0755        | -0.2092        | 0.0497         |
| 2           | B       | -0.0539         | -0.0140        | 0.0017           | 0.0009         | -0.0373        | 0.1462         |
| 3           | B       | -0.0060         | -0.0289        | 0.0250           | 0.0240         | 0.0734         | -0.0011        |
| 4           | B       | 0.2197          | 0.0461         | 0.0007           | 0.0003         | 0.0777         | -0.0122        |
| 5           | B       | -0.1540         | -0.0016        | 0.0542           | 0.0529         | 0.1732         | 0.0646         |
| 6           | B       | 0.1870          | 0.0150         | -0.0750          | -0.0754        | -0.2105        | 0.0467         |
| 7           | B       | 0.2249          | 0.0305         | -0.0550          | -0.0555        | -0.2012        | -0.0481        |
| 8           | B       | 0.2080          | 0.0278         | -0.0285          | -0.0288        | -0.1146        | -0.0338        |
| 9           | B       | -0.1540         | -0.0016        | 0.0541           | 0.0529         | 0.1832         | 0.0646         |
| 10          | B       | 0.1522          | 0.0112         | -0.0721          | -0.0728        | -0.2501        | 0.2267         |
| 11          | B       | -0.1558         | 0.0171         | 0.0638           | 0.0629         | 0.1990         | -0.1515        |
| 12          | B       | -0.1301         | 0.0052         | 0.0553           | 0.0548         | 0.0882         | 0.0146         |
| 13          | B       | -0.0539         | -0.0140        | 0.0018           | 0.0010         | -0.0379        | 0.1462         |
| 14          | B       | -0.0405         | -0.0029        | 0.0375           | 0.0370         | 0.1189         | -0.0416        |
| 15          | B       | 0.2249          | 0.0305         | -0.0550          | -0.0555        | -0.1930        | -0.0509        |
| 16          | B       | 0.2080          | 0.0278         | -0.0286          | -0.0289        | -0.1151        | -0.0357        |
| 17          | B       | -0.0832         | 0.0009         | 0.0467           | 0.0458         | 0.1375         | 0.0597         |
| 18          | B       | 0.2249          | 0.0305         | -0.0550          | -0.0555        | -0.1937        | -0.0501        |
| 19          | B       | -0.1540         | -0.0016        | 0.0542           | 0.0529         | 0.1815         | 0.0648         |
| 20          | B       | -0.0405         | -0.0029        | 0.0376           | 0.0371         | 0.1179         | -0.0414        |
| 21          | B       | -0.0060         | -0.0289        | 0.0252           | 0.0241         | 0.0713         | -0.0010        |
| 22          | B       | -0.1301         | 0.0052         | 0.0553           | 0.0548         | 0.0914         | 0.0145         |
| 23          | B       | 0.2197          | 0.0461         | 0.0007           | 0.0002         | 0.0729         | -0.0126        |
| 24          | B       | -0.1674         | -0.0063        | 0.0568           | 0.0555         | 0.2126         | 0.0252         |
| 25          | B       | -0.0832         | 0.0009         | 0.0468           | 0.0459         | 0.1412         | 0.0596         |
| 26          | B       | -0.0832         | 0.0009         | 0.0467           | 0.0458         | 0.1394         | 0.0595         |
| 27          | B       | -0.1558         | 0.0171         | 0.0639           | 0.0630         | 0.1984         | -0.1515        |
| 28          | B       | -0.1674         | -0.0063        | 0.0568           | 0.0554         | 0.2063         | 0.0250         |
| 29          | B       | -0.0405         | -0.0029        | 0.0376           | 0.0371         | 0.1183         | -0.0416        |
| 30          | B       | 0.1522          | 0.0112         | -0.0721          | -0.0727        | -0.2377        | 0.2260         |
| 31          | B       | 0.1522          | 0.0112         | -0.0720          | -0.0727        | -0.2357        | 0.2256         |
| 32          | B       | 0.1870          | 0.0150         | -0.0751          | -0.0755        | -0.2144        | 0.0468         |
| 33          | B       | -0.0060         | -0.0289        | 0.0251           | 0.0240         | 0.0752         | -0.0010        |
| 34          | B       | -0.1301         | 0.0052         | 0.0553           | 0.0548         | 0.0889         | 0.0146         |
| 35          | B       | 0.2197          | 0.0461         | 0.0007           | 0.0003         | 0.0728         | -0.0131        |
| 36          | B       | -0.0539         | -0.0140        | 0.0018           | 0.0010         | -0.0412        | 0.1463         |
| 37          | B       | 0.2080          | 0.0278         | -0.0285          | -0.0289        | -0.1094        | -0.0370        |
| 38          | B       | -0.1674         | -0.0063        | 0.0569           | 0.0555         | 0.2117         | 0.0251         |
| 39          | B       | -0.1558         | 0.0171         | 0.0640           | 0.0631         | 0.1926         | -0.1515        |
| 40          | F       | -0.6031         | -0.3004        | -0.3336          | -0.3051        | -0.8424        | -0.8221        |
| F1(B39)     |         | 0.6031          | 0.3004         | 0.3339           | 0.3055         | 0.8424         | 0.8765         |
| F2(F)       |         | -0.6031         | -0.3004        | -0.3336          | -0.3051        | -0.8424        | -0.8221        |
| Total       |         | 0.0000          | 0.0000         | 0.0003           | 0.0003         | 0.0000         | 0.0544         |

F calibration curve construction:

| Charges on F | F 1s orbital energies | Orbital energies in F@B39 complex |
|--------------|-----------------------|-----------------------------------|
| -2           | -24.21387             | F 1s -24.59440                    |
| -1           | -24.42497             |                                   |
| 0            | -24.86812             |                                   |
| 1            | -25.46937             |                                   |
| 2            | -26.23521             |                                   |

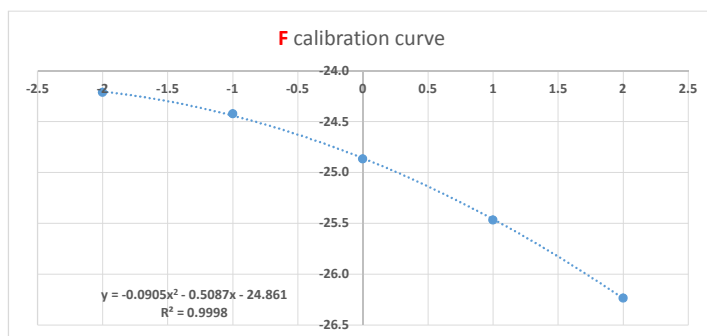

$Q_{\text{predicted}} = -0.585$

| Cl@B39 [0,1] |         | Mulliken Scheme | Lowdin Scheme  | Hirshfeld Scheme | CM5 Scheme     | NPA Scheme     | Bader Scheme   |
|--------------|---------|-----------------|----------------|------------------|----------------|----------------|----------------|
| Atom Number  | Element | Charge density  | Charge density | Charge density   | Charge density | Charge density | Charge density |
| 1            | B       | 0.3405          | 0.0122         | -0.0639          | -0.0653        | -0.1689        | -1.63E-02      |
| 2            | B       | -0.0502         | -0.0319        | 0.0009           | -0.0022        | -0.0146        | 1.08E-01       |
| 3            | B       | -0.0605         | -0.0627        | 0.0153           | 0.0112         | 0.0603         | -1.70E-03      |
| 4            | B       | 0.2794          | 0.0354         | -0.0018          | -0.0034        | 0.0835         | -1.38E-02      |
| 5            | B       | -0.3442         | -0.0528        | 0.0422           | 0.0373         | 0.1659         | 1.99E-02       |
| 6            | B       | 0.3268          | 0.0092         | -0.0672          | -0.0686        | -0.1735        | 1.40E-02       |
| 7            | B       | 0.3759          | 0.0105         | -0.0634          | -0.0655        | -0.2058        | -5.22E-02      |
| 8            | B       | 0.2918          | 0.0153         | -0.0287          | -0.0299        | -0.0698        | -5.58E-02      |
| 9            | B       | -0.3331         | -0.0538        | 0.0372           | 0.0323         | 0.1499         | 6.82E-02       |
| 10           | B       | 0.2735          | -0.0087        | -0.0720          | -0.0747        | -0.2142        | 2.01E-01       |
| 11           | B       | -0.2486         | -0.0283        | 0.0330           | 0.0295         | 0.1032         | -1.48E-01      |
| 12           | B       | -0.2195         | -0.0200        | 0.0354           | 0.0335         | 0.0276         | 2.69E-02       |
| 13           | B       | -0.0230         | -0.0375        | -0.0003          | -0.0035        | 0.0023         | 1.15E-01       |
| 14           | B       | -0.1047         | -0.0152        | 0.0239           | 0.0219         | 0.0572         | -5.86E-03      |
| 15           | B       | 0.3285          | -0.0014        | -0.0768          | -0.0789        | -0.2152        | -2.65E-02      |
| 16           | B       | 0.3185          | 0.0237         | -0.0162          | -0.0174        | -0.0462        | -6.70E-02      |
| 17           | B       | -0.1650         | -0.0400        | 0.0258           | 0.0225         | 0.1065         | 1.00E-01       |
| 18           | B       | 0.3342          | 0.0048         | -0.0719          | -0.0740        | -0.2172        | -4.61E-02      |
| 19           | B       | -0.3295         | -0.0552        | 0.0499           | 0.0450         | 0.1933         | 3.61E-02       |
| 20           | B       | -0.0853         | -0.0115        | 0.0396           | 0.0377         | 0.1644         | -2.76E-02      |
| 21           | B       | -0.0631         | -0.0608        | 0.0113           | 0.0073         | 0.0373         | -1.45E-02      |
| 22           | B       | -0.2105         | -0.0217        | 0.0366           | 0.0348         | 0.0410         | 2.08E-02       |
| 23           | B       | 0.2602          | 0.0384         | 0.0013           | -0.0003        | 0.0892         | 1.19E-04       |
| 24           | B       | -0.3431         | -0.0736        | 0.0320           | 0.0266         | 0.1656         | 5.17E-02       |
| 25           | B       | -0.1633         | -0.0539        | 0.0182           | 0.0149         | 0.1119         | 9.24E-02       |
| 26           | B       | -0.1431         | -0.0305        | 0.0295           | 0.0262         | 0.1080         | 7.97E-02       |
| 27           | B       | -0.2633         | -0.0351        | 0.0244           | 0.0210         | 0.0965         | -1.11E-01      |
| 28           | B       | -0.3467         | -0.0673        | 0.0368           | 0.0314         | 0.1583         | 3.83E-03       |
| 29           | B       | -0.1204         | -0.0306        | 0.0103           | 0.0083         | 0.0139         | 3.42E-02       |
| 30           | B       | 0.3065          | -0.0042        | -0.0623          | -0.0650        | -0.1828        | 1.82E-01       |
| 31           | B       | 0.2805          | 0.0066         | -0.0492          | -0.0519        | -0.1550        | 1.66E-01       |
| 32           | B       | 0.3695          | 0.0450         | -0.0259          | -0.0274        | -0.0386        | -9.98E-02      |
| 33           | B       | -0.0370         | -0.0515        | 0.0147           | 0.0107         | 0.0035         | -1.24E-02      |
| 34           | B       | -0.2127         | -0.0240        | 0.0356           | 0.0337         | 0.0448         | 2.37E-02       |
| 35           | B       | 0.2477          | 0.0251         | -0.0136          | -0.0152        | 0.0635         | 1.70E-02       |
| 36           | B       | -0.0448         | -0.0392        | 0.0010           | -0.0022        | -0.0042        | 1.24E-01       |
| 37           | B       | 0.3102          | 0.0219         | -0.0206          | -0.0219        | -0.0488        | -6.25E-02      |
| 38           | B       | -0.3531         | -0.0627        | 0.0479           | 0.0425         | 0.1880         | 2.94E-02       |
| 39           | B       | -0.2686         | -0.0319        | 0.0287           | 0.0253         | 0.0792         | -9.43E-02      |
| 40           | Cl      | -0.1105         | 0.7580         | 0.0023           | 0.1141         | -0.5598        | -6.18E-01      |
| F1(B39)      |         | 0.1105          | -0.7580        | -0.0023          | -0.1141        | 0.5597         | 0.6579         |
| F2(Cl)       |         | -0.1105         | 0.7580         | 0.0023           | 0.1141         | -0.5598        | -0.6181        |
| Total        |         | 0.0000          | 0.0000         | 0.0000           | 0.0000         | 0.0000         | 0.0398         |

Cl calibration curve construction:

| Charges on Cl | Cl 1s orbital energies | Orbital energies in Cl@B39 complex |
|---------------|------------------------|------------------------------------|
| -2            | -101.37098             | Cl 1s -101.62826                   |
| -1            | -101.51657             |                                    |
| 0             | -101.75375             |                                    |
| 1             | -102.07354             |                                    |
| 2             | -102.47303             |                                    |

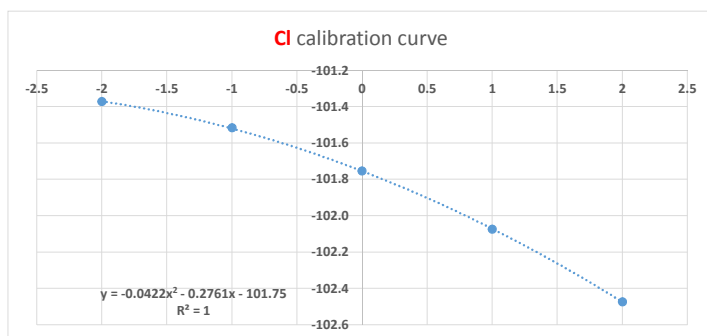

$Q_{\text{predicted}} = -0.475$

| Br@B39 [0,1] |         | Mulliken Scheme | Lowdin Scheme  | Hirshfeld Scheme | CM5 Scheme     | NPA Scheme     | Bader Scheme   |
|--------------|---------|-----------------|----------------|------------------|----------------|----------------|----------------|
| Atom Number  | Element | Charge density  | Charge density | Charge density   | Charge density | Charge density | Charge density |
| 1            | B       | 0.2947          | 0.0018         | -0.0738          | -0.0765        | -0.1927        | 1.28E-02       |
| 2            | B       | -0.0235         | -0.0473        | -0.0067          | -0.0127        | -0.0101        | 1.02E-01       |
| 3            | B       | -0.0728         | -0.0751        | 0.0064           | -0.0012        | 0.0485         | -1.95E-02      |
| 4            | B       | 0.0956          | 0.0196         | -0.0173          | -0.0203        | 0.0610         | 9.43E-03       |
| 5            | B       | -0.2685         | -0.0662        | 0.0316           | 0.0224         | 0.1320         | 6.01E-02       |
| 6            | B       | 0.3300          | 0.0281         | -0.0434          | -0.0461        | -0.0836        | -6.74E-02      |
| 7            | B       | 0.4004          | 0.0098         | -0.0655          | -0.0694        | -0.2058        | -6.82E-02      |
| 8            | B       | 0.1643          | 0.0175         | -0.0219          | -0.0242        | -0.0495        | -6.38E-02      |
| 9            | B       | -0.3002         | -0.0708        | 0.0425           | 0.0333         | 0.1694         | 2.34E-02       |
| 10           | B       | 0.3392          | 0.0079         | -0.0444          | -0.0494        | -0.1429        | 1.24E-01       |
| 11           | B       | -0.1701         | -0.0427        | 0.0214           | 0.0150         | 0.0578         | -1.05E-01      |
| 12           | B       | -0.0873         | -0.0314        | 0.0316           | 0.0282         | 0.0383         | 1.93E-02       |
| 13           | B       | -0.0477         | -0.0483        | -0.0037          | -0.0097        | -0.0007        | 1.11E-01       |
| 14           | B       | -0.0367         | -0.0244        | 0.0282           | 0.0244         | 0.1327         | -2.49E-02      |
| 15           | B       | 0.4067          | 0.0089         | -0.0649          | -0.0688        | -0.1900        | -6.09E-02      |
| 16           | B       | 0.1609          | 0.0177         | -0.0231          | -0.0255        | -0.0507        | -6.39E-02      |
| 17           | B       | -0.2218         | -0.0665        | 0.0112           | 0.0050         | 0.0944         | 9.11E-02       |
| 18           | B       | 0.3649          | -0.0035        | -0.0784          | -0.0822        | -0.2144        | -2.94E-02      |
| 19           | B       | -0.3203         | -0.0681        | 0.0413           | 0.0321         | 0.1706         | 5.03E-03       |
| 20           | B       | -0.0647         | -0.0365        | 0.0114           | 0.0077         | 0.0463         | 1.63E-02       |
| 21           | B       | -0.0411         | -0.0657        | 0.0054           | -0.0022        | -0.0186        | -2.42E-02      |
| 22           | B       | -0.1005         | -0.0283        | 0.0320           | 0.0286         | 0.0272         | 2.03E-02       |
| 23           | B       | 0.1298          | 0.0292         | -0.0061          | -0.0092        | 0.0816         | -1.27E-02      |
| 24           | B       | -0.2909         | -0.0854        | 0.0374           | 0.0274         | 0.1572         | 3.12E-02       |
| 25           | B       | -0.1848         | -0.0532        | 0.0136           | 0.0074         | 0.0788         | 8.94E-02       |
| 26           | B       | -0.2184         | -0.0533        | 0.0155           | 0.0093         | 0.0836         | 9.84E-02       |
| 27           | B       | -0.1527         | -0.0443        | 0.0212           | 0.0148         | 0.0809         | -1.48E-01      |
| 28           | B       | -0.2589         | -0.0913        | 0.0228           | 0.0127         | 0.1382         | 3.24E-02       |
| 29           | B       | -0.0504         | -0.0295        | 0.0164           | 0.0127         | 0.0526         | 2.70E-04       |
| 30           | B       | 0.3239          | -0.0151        | -0.0758          | -0.0808        | -0.2028        | 1.88E-01       |
| 31           | B       | 0.3311          | -0.0036        | -0.0574          | -0.0624        | -0.1592        | 1.54E-01       |
| 32           | B       | 0.3069          | 0.0104         | -0.0636          | -0.0662        | -0.1553        | -2.55E-02      |
| 33           | B       | -0.0508         | -0.0740        | 0.0071           | -0.0005        | 0.0368         | -1.32E-02      |
| 34           | B       | -0.0922         | -0.0298        | 0.0334           | 0.0300         | 0.0434         | 1.55E-02       |
| 35           | B       | 0.1013          | 0.0263         | -0.0114          | -0.0145        | 0.0648         | 1.18E-02       |
| 36           | B       | -0.0338         | -0.0421        | 0.0007           | -0.0052        | -0.0084        | 9.00E-02       |
| 37           | B       | 0.1525          | 0.0118         | -0.0312          | -0.0335        | -0.0714        | -5.45E-02      |
| 38           | B       | -0.2939         | -0.0872        | 0.0293           | 0.0193         | 0.1355         | -5.64E-03      |
| 39           | B       | -0.1939         | -0.0467        | 0.0193           | 0.0129         | 0.0821         | -1.15E-01      |
| 40           | Br      | -0.3261         | 1.1415         | 0.2090           | 0.4172         | -0.2576        | -3.57E-01      |
| F1(B39)      |         | 0.3261          | -1.1415        | -0.2091          | -0.4172        | 0.2576         | 0.4047         |
| F2(Br)       |         | -0.3261         | 1.1415         | 0.2090           | 0.4172         | -0.2576        | -0.3566        |
| Total        |         | 0.0000          | 0.0000         | 0.0000           | 0.0000         | 0.0000         | 0.0481         |

Br calibration curve construction:

| Charges on Br | Br 1s orbital energies | Orbital energies in Br@B39 complex |
|---------------|------------------------|------------------------------------|
| -2            | -483.02043             | Br 1s -483.23916                   |
| -1            | -483.11004             |                                    |
| 0             | -483.29595             |                                    |
| 1             | -483.55083             |                                    |
| 2             | -483.85900             |                                    |

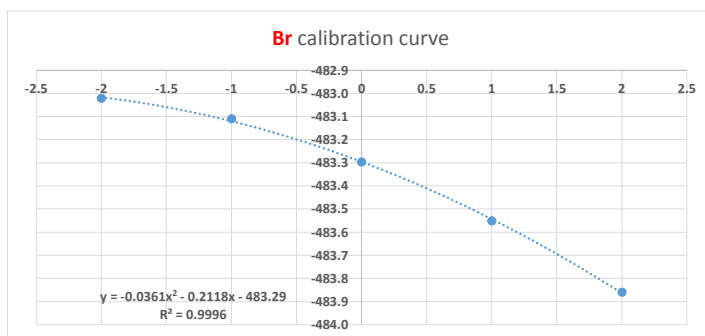

$Q_{\text{predicted}} = -0.251$

| NO@B39 [0,1] |         | Mulliken Scheme | Lowdin Scheme  | Hirshfeld Scheme | CM5 Scheme     | NPA Scheme     | Bader Scheme   |
|--------------|---------|-----------------|----------------|------------------|----------------|----------------|----------------|
| Atom Number  | Element | Charge density  | Charge density | Charge density   | Charge density | Charge density | Charge density |
| 1            | B       | 0.3144          | 0.0278         | -0.0474          | -0.0474        | -0.0936        | -6.65E-02      |
| 2            | B       | -0.0637         | -0.0368        | -0.0115          | -0.0120        | -0.0352        | 1.02E-01       |
| 3            | B       | -0.1195         | -0.0633        | 0.0021           | 0.0020         | 0.0202         | -1.62E-02      |
| 4            | B       | 0.2371          | 0.0271         | -0.0151          | -0.0158        | 0.0665         | -1.38E-02      |
| 5            | B       | -0.3697         | -0.0423        | 0.0241           | 0.0237         | 0.1332         | 5.53E-03       |
| 6            | B       | 0.3144          | 0.0278         | -0.0475          | -0.0474        | -0.0929        | -6.77E-02      |
| 7            | B       | 0.3760          | 0.0049         | -0.0774          | -0.0775        | -0.2009        | -4.55E-02      |
| 8            | B       | 0.2782          | 0.0166         | -0.0286          | -0.0292        | -0.0471        | -7.25E-02      |
| 9            | B       | -0.3697         | -0.0423        | 0.0240           | 0.0236         | 0.1147         | 5.55E-03       |
| 10           | B       | 0.3997          | -0.0064        | -0.0785          | -0.0789        | -0.1939        | 1.77E-01       |
| 11           | B       | -0.3405         | -0.0346        | 0.0127           | 0.0118         | 0.0429         | -1.43E-01      |
| 12           | B       | -0.2120         | -0.0345        | 0.0265           | 0.0255         | 0.0295         | 1.02E-02       |
| 13           | B       | -0.0637         | -0.0368        | -0.0115          | -0.0120        | -0.0317        | 1.01E-01       |
| 14           | B       | -0.0525         | -0.0315        | 0.0122           | 0.0124         | 0.0611         | 1.38E-02       |
| 15           | B       | 0.3760          | 0.0049         | -0.0774          | -0.0775        | -0.2036        | -4.65E-02      |
| 16           | B       | 0.2782          | 0.0166         | -0.0286          | -0.0293        | -0.0521        | -7.12E-02      |
| 17           | B       | -0.1452         | -0.0522        | 0.0146           | 0.0146         | 0.0853         | 6.66E-02       |
| 18           | B       | 0.3760          | 0.0049         | -0.0773          | -0.0775        | -0.2100        | -4.72E-02      |
| 19           | B       | -0.3697         | -0.0423        | 0.0241           | 0.0237         | 0.1290         | 5.67E-03       |
| 20           | B       | -0.0525         | -0.0315        | 0.0122           | 0.0123         | 0.0624         | 1.38E-02       |
| 21           | B       | -0.1195         | -0.0633        | 0.0021           | 0.0020         | 0.0202         | -1.64E-02      |
| 22           | B       | -0.2120         | -0.0345        | 0.0266           | 0.0255         | 0.0271         | 1.02E-02       |
| 23           | B       | 0.2371          | 0.0271         | -0.0151          | -0.0157        | 0.0666         | -1.45E-02      |
| 24           | B       | -0.4504         | -0.0557        | 0.0137           | 0.0132         | 0.1038         | -1.24E-02      |
| 25           | B       | -0.1452         | -0.0522        | 0.0146           | 0.0146         | 0.0839         | 6.66E-02       |
| 26           | B       | -0.1452         | -0.0522        | 0.0146           | 0.0146         | 0.0878         | 6.67E-02       |
| 27           | B       | -0.3405         | -0.0346        | 0.0127           | 0.0118         | 0.0383         | -1.43E-01      |
| 28           | B       | -0.4504         | -0.0557        | 0.0138           | 0.0133         | 0.1100         | -1.26E-02      |
| 29           | B       | -0.0525         | -0.0315        | 0.0122           | 0.0124         | 0.0621         | 1.37E-02       |
| 30           | B       | 0.3997          | -0.0064        | -0.0786          | -0.0789        | -0.1923        | 1.77E-01       |
| 31           | B       | 0.3997          | -0.0064        | -0.0785          | -0.0789        | -0.2103        | 1.77E-01       |
| 32           | B       | 0.3144          | 0.0278         | -0.0474          | -0.0473        | -0.0938        | -6.80E-02      |
| 33           | B       | -0.1195         | -0.0633        | 0.0021           | 0.0021         | 0.0170         | -1.59E-02      |
| 34           | B       | -0.2120         | -0.0345        | 0.0266           | 0.0255         | 0.0265         | 1.01E-02       |
| 35           | B       | 0.2371          | 0.0271         | -0.0151          | -0.0157        | 0.0715         | -1.33E-02      |
| 36           | B       | -0.0637         | -0.0368        | -0.0115          | -0.0120        | -0.0308        | 1.01E-01       |
| 37           | B       | 0.2782          | 0.0166         | -0.0286          | -0.0292        | -0.0527        | -7.18E-02      |
| 38           | B       | -0.4504         | -0.0557        | 0.0138           | 0.0133         | 0.1110         | -1.25E-02      |
| 39           | B       | -0.3405         | -0.0346        | 0.0127           | 0.0118         | 0.0432         | -1.43E-01      |
| 40           | O       | 0.2170          | 0.4615         | 0.1731           | 0.2507         | -0.2357        | -4.47E-01      |
| 41           | N       | 0.2274          | 0.3810         | 0.2853           | 0.2223         | 0.3625         | 4.77E-01       |
| F1(B39)      |         | -0.4444         | -0.8425        | -0.4577          | -0.4722        | -0.1268        | 0.0095         |
| F2(NO)       |         | 0.4444          | 0.8425         | 0.4585           | 0.4730         | 0.1268         | 0.0297         |
| Total        |         | 0.0000          | 0.0000         | 0.0008           | 0.0008         | 0.0000         | 0.0392         |

N+O calibration curve constraction:

| Charges on NO | O 1s orbital energies | N 1s orbital energies | Orbital energies in NO@B39 complex |           |
|---------------|-----------------------|-----------------------|------------------------------------|-----------|
| -2            | -18.92336             | -14.07920             | O 1s                               | -19.41203 |
| -1            | -19.10629             | -14.26065             | N 1s                               | -14.60064 |
| 0             | -19.34540             | -14.51986             |                                    |           |
| 1             | -19.66771             | -14.86562             |                                    |           |
| 2             | -20.02529             | -15.28306             |                                    |           |

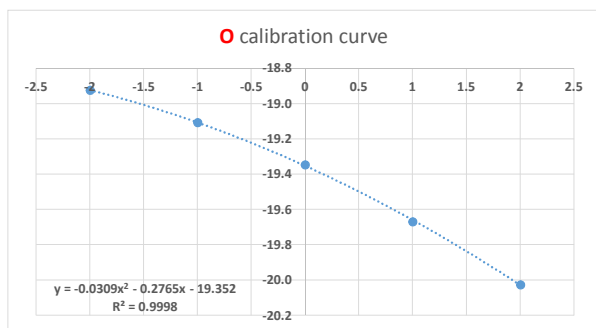

$$Q_{\text{predicted}}^{\text{O}} = 0.212$$

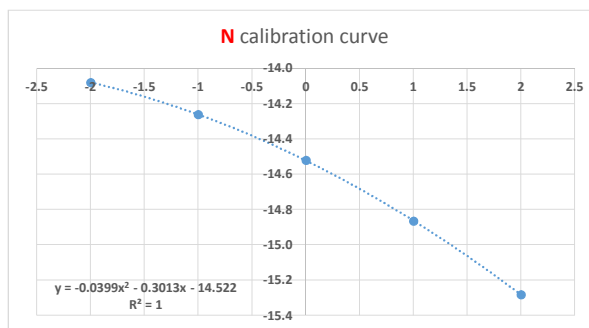

$$Q_{\text{predicted}}^{\text{N}} = 0.253$$



| CN@B39 [0,1] |         | Mulliken Scheme | Lowdin Scheme  | Hirshfeld Scheme | CM5 Scheme     | NPA Scheme     | Bader Scheme   |
|--------------|---------|-----------------|----------------|------------------|----------------|----------------|----------------|
| Atom Number  | Element | Charge density  | Charge density | Charge density   | Charge density | Charge density | Charge density |
| 1            | B       | 0.1781          | 0.0118         | -0.0759          | -0.0759        | -0.2013        | 5.43E-02       |
| 2            | B       | -0.0573         | -0.0242        | -0.0040          | -0.0060        | -0.0488        | 1.36E-01       |
| 3            | B       | -0.1132         | -0.0454        | 0.0179           | 0.0171         | 0.0651         | 1.35E-03       |
| 4            | B       | 0.1468          | 0.0352         | -0.0042          | -0.0064        | 0.0868         | -1.09E-02      |
| 5            | B       | -0.1237         | -0.0107        | 0.0500           | 0.0481         | 0.1745         | 5.01E-02       |
| 6            | B       | 0.1781          | 0.0118         | -0.0758          | -0.0758        | -0.2024        | 5.43E-02       |
| 7            | B       | 0.3409          | 0.0312         | -0.0530          | -0.0536        | -0.1959        | -5.40E-02      |
| 8            | B       | 0.0740          | 0.0178         | -0.0346          | -0.0368        | -0.1080        | -1.50E-02      |
| 9            | B       | -0.1237         | -0.0107        | 0.0500           | 0.0482         | 0.1692         | 5.00E-02       |
| 10           | B       | 0.2959          | 0.0118         | -0.0697          | -0.0710        | -0.2394        | 2.20E-01       |
| 11           | B       | -0.1545         | -0.0012        | 0.0596           | 0.0565         | 0.2121         | -1.61E-01      |
| 12           | B       | -0.0125         | -0.0242        | 0.0461           | 0.0423         | 0.1219         | 3.21E-02       |
| 13           | B       | -0.0573         | -0.0242        | -0.0039          | -0.0060        | -0.0491        | 1.36E-01       |
| 14           | B       | -0.0316         | -0.0195        | 0.0354           | 0.0354         | 0.1411         | -2.23E-02      |
| 15           | B       | 0.3409          | 0.0312         | -0.0531          | -0.0536        | -0.1897        | -5.44E-02      |
| 16           | B       | 0.0740          | 0.0178         | -0.0346          | -0.0368        | -0.1133        | -1.85E-02      |
| 17           | B       | -0.1433         | -0.0178        | 0.0410           | 0.0406         | 0.1421         | 7.12E-02       |
| 18           | B       | 0.3409          | 0.0312         | -0.0530          | -0.0536        | -0.1887        | -5.22E-02      |
| 19           | B       | -0.1237         | -0.0107        | 0.0500           | 0.0482         | 0.1711         | 5.00E-02       |
| 20           | B       | -0.0316         | -0.0195        | 0.0355           | 0.0355         | 0.1411         | -2.21E-02      |
| 21           | B       | -0.1132         | -0.0454        | 0.0179           | 0.0171         | 0.0594         | 1.38E-03       |
| 22           | B       | -0.0125         | -0.0242        | 0.0461           | 0.0423         | 0.1216         | 3.19E-02       |
| 23           | B       | 0.1468          | 0.0352         | -0.0043          | -0.0064        | 0.0865         | -1.10E-02      |
| 24           | B       | -0.1354         | -0.0188        | 0.0508           | 0.0488         | 0.2100         | 1.44E-02       |
| 25           | B       | -0.1433         | -0.0178        | 0.0410           | 0.0406         | 0.1455         | 7.11E-02       |
| 26           | B       | -0.1433         | -0.0178        | 0.0409           | 0.0406         | 0.1432         | 7.10E-02       |
| 27           | B       | -0.1545         | -0.0012        | 0.0596           | 0.0565         | 0.2123         | -1.61E-01      |
| 28           | B       | -0.1354         | -0.0188        | 0.0508           | 0.0488         | 0.2030         | 1.43E-02       |
| 29           | B       | -0.0316         | -0.0195        | 0.0354           | 0.0354         | 0.1399         | -2.24E-02      |
| 30           | B       | 0.2959          | 0.0118         | -0.0697          | -0.0710        | -0.2319        | 2.19E-01       |
| 31           | B       | 0.2959          | 0.0118         | -0.0697          | -0.0710        | -0.2315        | 2.20E-01       |
| 32           | B       | 0.1781          | 0.0118         | -0.0759          | -0.0759        | -0.2018        | 5.35E-02       |
| 33           | B       | -0.1132         | -0.0454        | 0.0178           | 0.0170         | 0.0609         | 1.24E-03       |
| 34           | B       | -0.0125         | -0.0242        | 0.0461           | 0.0423         | 0.1188         | 3.21E-02       |
| 35           | B       | 0.1468          | 0.0352         | -0.0043          | -0.0065        | 0.0895         | -8.44E-03      |
| 36           | B       | -0.0573         | -0.0242        | -0.0040          | -0.0060        | -0.0547        | 1.36E-01       |
| 37           | B       | 0.0740          | 0.0178         | -0.0346          | -0.0367        | -0.1058        | -1.93E-02      |
| 38           | B       | -0.1354         | -0.0188        | 0.0508           | 0.0488         | 0.2112         | 1.44E-02       |
| 39           | B       | -0.1545         | -0.0012        | 0.0597           | 0.0566         | 0.2058         | -1.61E-01      |
| 40           | C       | -0.8426         | -0.0595        | -0.0455          | 0.1361         | 0.1672         | 6.89E-01       |
| 41           | N       | 0.0500          | 0.2216         | -0.1319          | -0.2529        | -1.2375        | -1.59E+00      |
| F1(B39)      |         | 0.7926          | -0.1621        | 0.1780           | 0.1174         | 1.0703         | 0.9427         |
| F2(CN)       |         | -0.7926         | 0.1621         | -0.1774          | -0.1168        | -1.0703        | -0.8992        |
| Total        |         | 0.0000          | 0.0000         | 0.0006           | 0.0006         | 0.0000         | 0.0436         |

N+C calibration curve constraction:

| Charges on CN | N 1s orbital energies | C 1s orbital energies | Orbital energies in CN@B39 complex |
|---------------|-----------------------|-----------------------|------------------------------------|
| -2            | -14.14861             | -10.02157             | N 1s -14.30035                     |
| -1            | -14.26022             | -10.11569             | C 1s -10.16208                     |
| 0             | -14.44832             | -10.34491             |                                    |
| 1             | -14.72820             | -10.63958             |                                    |
| 2             | -15.05867             | -10.99190             |                                    |

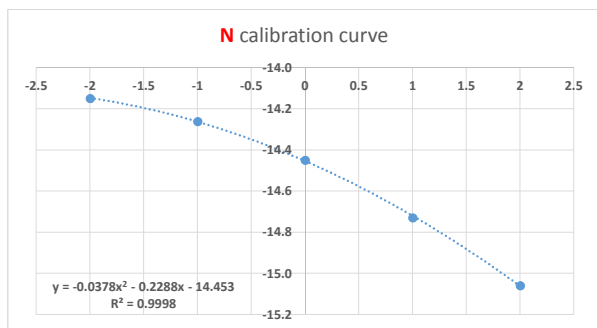

$$Q_{\text{predicted}}^{\text{N}} = -0.763$$

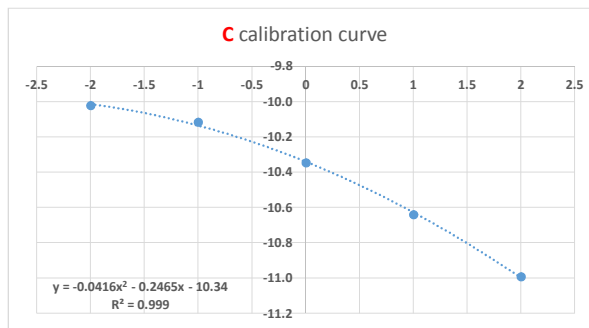

$$Q_{\text{predicted}}^{\text{C}} = -0.841$$

| FO@B39 [0,1] |         | Mulliken Scheme | Lowdin Scheme  | Hirshfeld Scheme | CM5 Scheme     | NPA Scheme     | Bader Scheme   |
|--------------|---------|-----------------|----------------|------------------|----------------|----------------|----------------|
| Atom Number  | Element | Charge density  | Charge density | Charge density   | Charge density | Charge density | Charge density |
| 1            | B       | 0.2678          | 0.0281         | -0.0473          | -0.0488        | -0.1054        | -2.06E-02      |
| 2            | B       | -0.0174         | -0.0191        | 0.0042           | 0.0031         | 0.0089         | 1.14E-01       |
| 3            | B       | -0.0884         | -0.0413        | 0.0108           | 0.0087         | 0.0198         | -2.14E-02      |
| 4            | B       | 0.1817          | 0.0293         | -0.0120          | -0.0128        | 0.0719         | 1.79E-02       |
| 5            | B       | -0.2005         | -0.0192        | 0.0398           | 0.0381         | 0.1448         | 5.47E-02       |
| 6            | B       | 0.2951          | 0.0559         | -0.0158          | -0.0172        | -0.0155        | -1.44E-01      |
| 7            | B       | 0.2288          | 0.0089         | -0.0763          | -0.0771        | -0.2363        | -3.56E-02      |
| 8            | B       | 0.1909          | 0.0155         | -0.0303          | -0.0311        | -0.0722        | -3.17E-02      |
| 9            | B       | -0.2087         | -0.0188        | 0.0416           | 0.0399         | 0.1588         | 2.42E-02       |
| 10           | B       | 0.2101          | 0.0182         | -0.0509          | -0.0518        | -0.1651        | 1.74E-01       |
| 11           | B       | -0.1984         | -0.0199        | 0.0301           | 0.0287         | 0.1038         | -9.59E-02      |
| 12           | B       | -0.0984         | -0.0289        | 0.0355           | 0.0340         | 0.0581         | 1.73E-02       |
| 13           | B       | -0.0349         | -0.0182        | 0.0040           | 0.0029         | -0.0021        | 1.11E-01       |
| 14           | B       | -0.0221         | -0.0208        | 0.0339           | 0.0314         | 0.1534         | -1.63E-02      |
| 15           | B       | 0.2471          | 0.0132         | -0.0709          | -0.0718        | -0.2269        | -3.14E-02      |
| 16           | B       | 0.1917          | 0.0119         | -0.0345          | -0.0354        | -0.0749        | -3.25E-02      |
| 17           | B       | -0.1304         | -0.0364        | 0.0211           | 0.0187         | 0.1083         | 8.06E-02       |
| 18           | B       | 0.2349          | 0.0124         | -0.0682          | -0.0691        | -0.2176        | -4.51E-02      |
| 19           | B       | -0.1972         | -0.0140        | 0.0366           | 0.0348         | 0.1343         | 1.96E-02       |
| 20           | B       | -0.0539         | -0.0321        | 0.0010           | -0.0014        | -0.0289        | 4.49E-02       |
| 21           | B       | -0.0930         | -0.0356        | 0.0169           | 0.0148         | 0.0058         | 7.76E-03       |
| 22           | B       | -0.0995         | -0.0287        | 0.0356           | 0.0341         | 0.0560         | 2.06E-02       |
| 23           | B       | 0.1949          | 0.0306         | -0.0123          | -0.0132        | 0.0673         | 1.87E-02       |
| 24           | B       | -0.2336         | -0.0203        | 0.0438           | 0.0419         | 0.1828         | 8.03E-03       |
| 25           | B       | -0.1315         | -0.0147        | 0.0398           | 0.0375         | 0.1233         | 6.31E-02       |
| 26           | B       | -0.1426         | -0.0382        | 0.0246           | 0.0223         | 0.1154         | 8.36E-02       |
| 27           | B       | -0.1771         | -0.0134        | 0.0397           | 0.0384         | 0.1362         | -1.58E-01      |
| 28           | B       | -0.2189         | -0.0257        | 0.0401           | 0.0382         | 0.1804         | 4.35E-02       |
| 29           | B       | -0.0307         | -0.0099        | 0.0301           | 0.0277         | 0.0972         | -2.43E-02      |
| 30           | B       | 0.1688          | 0.0069         | -0.0689          | -0.0698        | -0.2134        | 2.15E-01       |
| 31           | B       | 0.1872          | 0.0096         | -0.0636          | -0.0645        | -0.1955        | 1.82E-01       |
| 32           | B       | 0.2566          | -0.0019        | -0.0845          | -0.0859        | -0.2234        | 3.77E-02       |
| 33           | B       | -0.0684         | -0.0455        | 0.0131           | 0.0110         | 0.0566         | -5.21E-03      |
| 34           | B       | -0.0912         | -0.0272        | 0.0357           | 0.0342         | 0.0529         | 1.58E-02       |
| 35           | B       | 0.1949          | 0.0370         | -0.0037          | -0.0046        | 0.0826         | 7.10E-03       |
| 36           | B       | -0.0470         | -0.0148        | 0.0033           | 0.0022         | -0.0058        | 9.67E-02       |
| 37           | B       | 0.1918          | 0.0131         | -0.0327          | -0.0335        | -0.0734        | -3.46E-02      |
| 38           | B       | -0.2169         | -0.0264        | 0.0340           | 0.0320         | 0.1583         | 1.71E-02       |
| 39           | B       | -0.1746         | -0.0165        | 0.0298           | 0.0285         | 0.1118         | -1.16E-01      |
| 40           | F       | -0.0284         | 0.2473         | 0.0715           | 0.1227         | -0.1761        | -3.01E-01      |
| 41           | O       | -0.2388         | 0.0496         | -0.0444          | -0.0372        | -0.3561        | -3.18E-01      |
| F1(B39)      |         | 0.2672          | -0.2969        | -0.0263          | -0.0848        | 0.5322         | 0.6618         |
| F2(FO)       |         | -0.2672         | 0.2969         | 0.0270           | 0.0855         | -0.5322        | -0.6192        |
| Total        |         | 0.0000          | 0.0000         | 0.0007           | 0.0007         | 0.0000         | 0.0426         |

F+O calibration curve construction:

| Charges on FO | F 1s orbital energies | O 1s orbital energies | Orbital energies in FO@B39 complex |
|---------------|-----------------------|-----------------------|------------------------------------|
| -2            | -24.42790             | -18.82396             | F 1s -24.81417                     |
| -1            | -24.63991             | -19.03829             | O 1s -19.24582                     |
| 0             | -24.87414             | -19.37617             |                                    |
| 1             | -25.21402             | -19.75222             |                                    |
| 2             | -25.60464             | -20.20892             |                                    |

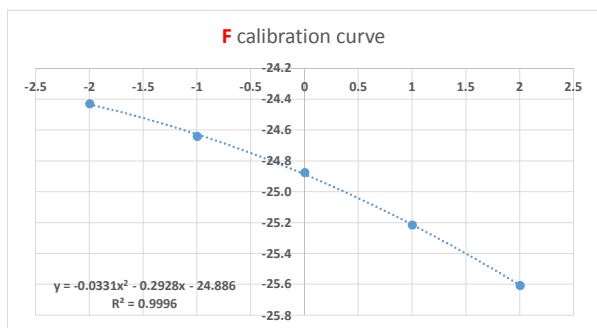

$Q_{\text{predicted}}^F = -0.253$

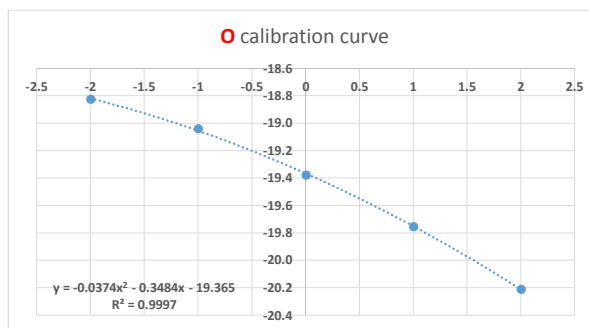

$Q_{\text{predicted}}^O = -0.355$

| CF@B39 [0,1] |         | Mulliken Scheme | Lowdin Scheme  | Hirshfeld Scheme | CM5 Scheme     | NPA Scheme     | Bader Scheme   |
|--------------|---------|-----------------|----------------|------------------|----------------|----------------|----------------|
| Atom Number  | Element | Charge density  | Charge density | Charge density   | Charge density | Charge density | Charge density |
| 1            | B       | 0.1922          | 0.0246         | -0.0526          | -0.0554        | -0.1061        | -5.84E-02      |
| 2            | B       | -0.0395         | -0.0336        | -0.0109          | -0.0129        | -0.0239        | 9.94E-02       |
| 3            | B       | -0.0168         | -0.0666        | 0.0044           | 0.0002         | 0.0375         | -3.00E-02      |
| 4            | B       | 0.1659          | 0.0272         | -0.0167          | -0.0181        | 0.0561         | -9.02E-03      |
| 5            | B       | -0.1957         | -0.0418        | 0.0254           | 0.0219         | 0.1366         | 1.89E-03       |
| 6            | B       | 0.1922          | 0.0246         | -0.0526          | -0.0554        | -0.1061        | -5.68E-02      |
| 7            | B       | 0.2673          | 0.0078         | -0.0748          | -0.0766        | -0.1986        | -5.26E-02      |
| 8            | B       | 0.2112          | 0.0157         | -0.0299          | -0.0312        | -0.0572        | -6.80E-02      |
| 9            | B       | -0.1957         | -0.0418        | 0.0253           | 0.0218         | 0.1366         | 1.90E-03       |
| 10           | B       | 0.2938          | -0.0044        | -0.0782          | -0.0800        | -0.2001        | 1.71E-01       |
| 11           | B       | -0.2829         | -0.0306        | 0.0124           | 0.0100         | 0.0448         | -1.38E-01      |
| 12           | B       | -0.1985         | -0.0345        | 0.0257           | 0.0235         | 0.0265         | 5.16E-03       |
| 13           | B       | -0.0395         | -0.0336        | -0.0109          | -0.0129        | -0.0239        | 9.92E-02       |
| 14           | B       | -0.0226         | -0.0393        | 0.0097           | 0.0050         | 0.0760         | 1.79E-02       |
| 15           | B       | 0.2673          | 0.0078         | -0.0747          | -0.0765        | -0.1986        | -5.20E-02      |
| 16           | B       | 0.2112          | 0.0157         | -0.0300          | -0.0313        | -0.0572        | -6.82E-02      |
| 17           | B       | -0.0600         | -0.0589        | 0.0147           | 0.0101         | 0.0901         | 6.52E-02       |
| 18           | B       | 0.2673          | 0.0078         | -0.0748          | -0.0765        | -0.1986        | -5.31E-02      |
| 19           | B       | -0.1957         | -0.0418        | 0.0255           | 0.0220         | 0.1366         | 1.85E-03       |
| 20           | B       | -0.0226         | -0.0393        | 0.0097           | 0.0049         | 0.0760         | 1.78E-02       |
| 21           | B       | -0.0168         | -0.0666        | 0.0045           | 0.0002         | 0.0375         | -2.99E-02      |
| 22           | B       | -0.1985         | -0.0345        | 0.0258           | 0.0235         | 0.0265         | 5.10E-03       |
| 23           | B       | 0.1659          | 0.0272         | -0.0167          | -0.0181        | 0.0561         | -9.48E-03      |
| 24           | B       | -0.3191         | -0.0540        | 0.0135           | 0.0096         | 0.1183         | -1.80E-02      |
| 25           | B       | -0.0600         | -0.0589        | 0.0147           | 0.0101         | 0.0901         | 6.52E-02       |
| 26           | B       | -0.0600         | -0.0589        | 0.0147           | 0.0101         | 0.0901         | 6.53E-02       |
| 27           | B       | -0.2829         | -0.0306        | 0.0124           | 0.0100         | 0.0448         | -1.38E-01      |
| 28           | B       | -0.3191         | -0.0540        | 0.0135           | 0.0097         | 0.1183         | -1.82E-02      |
| 29           | B       | -0.0226         | -0.0393        | 0.0098           | 0.0050         | 0.0760         | 1.77E-02       |
| 30           | B       | 0.2938          | -0.0044        | -0.0783          | -0.0801        | -0.2001        | 1.71E-01       |
| 31           | B       | 0.2938          | -0.0044        | -0.0783          | -0.0801        | -0.2001        | 1.71E-01       |
| 32           | B       | 0.1922          | 0.0246         | -0.0526          | -0.0554        | -0.1061        | -5.81E-02      |
| 33           | B       | -0.0168         | -0.0666        | 0.0045           | 0.0002         | 0.0375         | -2.98E-02      |
| 34           | B       | -0.1985         | -0.0345        | 0.0258           | 0.0236         | 0.0265         | 4.96E-03       |
| 35           | B       | 0.1659          | 0.0272         | -0.0166          | -0.0180        | 0.0561         | -9.24E-03      |
| 36           | B       | -0.0395         | -0.0336        | -0.0108          | -0.0129        | -0.0239        | 9.93E-02       |
| 37           | B       | 0.2112          | 0.0157         | -0.0299          | -0.0312        | -0.0572        | -6.79E-02      |
| 38           | B       | -0.3191         | -0.0540        | 0.0135           | 0.0097         | 0.1183         | -1.80E-02      |
| 39           | B       | -0.2829         | -0.0306        | 0.0123           | 0.0099         | 0.0448         | -1.38E-01      |
| 40           | C       | -0.1074         | 0.3372         | 0.3282           | 0.4286         | 0.5243         | 8.29E-01       |
| 41           | F       | 0.1210          | 0.5281         | 0.1439           | 0.1534         | -0.5235        | -7.43E-01      |
| F1(B39)      |         | -0.0135         | -0.8653        | -0.4717          | -0.5816        | -0.0008        | -0.0411        |
| F2(CF)       |         | 0.0135          | 0.8653         | 0.4721           | 0.5820         | 0.0008         | 0.0862         |
| Total        |         | 0.0000          | 0.0000         | 0.0005           | 0.0005         | 0.0000         | 0.0451         |

F+C calibration curve construction:

| Charges on CF | F 1s orbital energies | C 1s orbital energies | Orbital energies in CF@B39 complex |
|---------------|-----------------------|-----------------------|------------------------------------|
| -2            | -24.60253             | -10.03886             | F 1s -24.92486                     |
| -1            | -24.72069             | -10.16461             | C 1s -10.45571                     |
| 0             | -24.87854             | -10.37149             |                                    |
| 1             | -25.12975             | -10.71409             |                                    |
| 2             | -25.41892             | -11.12917             |                                    |

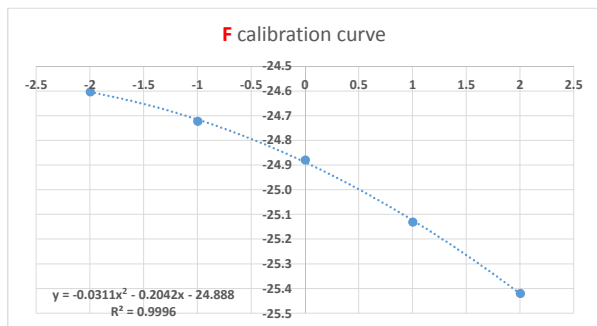

$Q^F_{\text{predicted}} = 0.176$

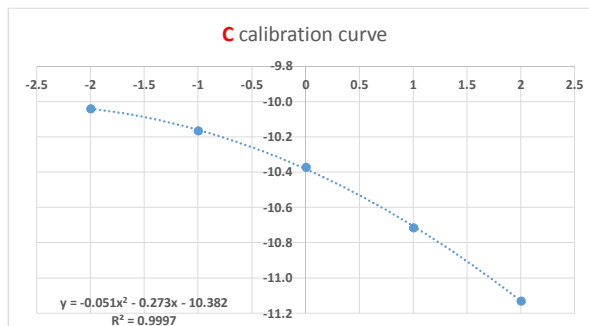

$Q^C_{\text{predicted}} = 0.257$

| Cu@B39 [0,1] |         | Mulliken Scheme | Lowdin Scheme  | Hirshfeld Scheme | CM5 Scheme     | NPA Scheme     | Bader Scheme   |
|--------------|---------|-----------------|----------------|------------------|----------------|----------------|----------------|
| Atom Number  | Element | Charge density  | Charge density | Charge density   | Charge density | Charge density | Charge density |
| 1            | B       | 0.2796          | 0.0151         | -0.0758          | -0.0802        | -0.1689        | -1.41E-02      |
| 2            | B       | -0.0214         | -0.0243        | -0.0119          | -0.0215        | -0.0456        | 7.33E-02       |
| 3            | B       | -0.0726         | -0.0381        | 0.0071           | -0.0052        | 0.0223         | -6.73E-02      |
| 4            | B       | 0.1881          | 0.0382         | -0.0154          | -0.0203        | 0.0685         | -2.24E-02      |
| 5            | B       | -0.3339         | -0.0233        | 0.0302           | 0.0153         | 0.0875         | -2.13E-02      |
| 6            | B       | 0.2811          | 0.0151         | -0.0758          | -0.0802        | -0.1699        | -1.19E-02      |
| 7            | B       | 0.3700          | 0.0250         | -0.0700          | -0.0763        | -0.1806        | -5.61E-02      |
| 8            | B       | 0.2836          | 0.0263         | -0.0292          | -0.0330        | -0.0550        | -7.41E-02      |
| 9            | B       | -0.3298         | -0.0232        | 0.0302           | 0.0153         | 0.0890         | -2.12E-02      |
| 10           | B       | 0.2451          | 0.0132         | -0.0710          | -0.0791        | -0.1887        | 1.48E-01       |
| 11           | B       | -0.2477         | -0.0190        | 0.0123           | 0.0019         | 0.0180         | -1.68E-01      |
| 12           | B       | -0.1839         | -0.0183        | 0.0267           | 0.0211         | 0.0127         | -7.99E-03      |
| 13           | B       | -0.0184         | -0.0243        | -0.0118          | -0.0215        | -0.0462        | 7.32E-02       |
| 14           | B       | -0.0647         | -0.0229        | 0.0097           | 0.0037         | 0.0640         | -2.53E-02      |
| 15           | B       | 0.3714          | 0.0250         | -0.0700          | -0.0763        | -0.1740        | -5.75E-02      |
| 16           | B       | 0.2834          | 0.0264         | -0.0292          | -0.0330        | -0.0504        | -7.41E-02      |
| 17           | B       | -0.1700         | -0.0358        | 0.0085           | -0.0016        | 0.0462         | 5.49E-02       |
| 18           | B       | 0.3688          | 0.0250         | -0.0699          | -0.0762        | -0.1742        | -5.83E-02      |
| 19           | B       | -0.3299         | -0.0232        | 0.0303           | 0.0154         | 0.0910         | -2.13E-02      |
| 20           | B       | -0.0658         | -0.0229        | 0.0098           | 0.0037         | 0.0638         | -2.51E-02      |
| 21           | B       | -0.0724         | -0.0381        | 0.0071           | -0.0052        | 0.0178         | -6.72E-02      |
| 22           | B       | -0.1875         | -0.0183        | 0.0266           | 0.0211         | 0.0142         | -8.13E-03      |
| 23           | B       | 0.1907          | 0.0382         | -0.0154          | -0.0204        | 0.0665         | -2.08E-02      |
| 24           | B       | -0.3355         | -0.0385        | 0.0166           | 0.0002         | 0.0588         | -4.53E-02      |
| 25           | B       | -0.1766         | -0.0358        | 0.0084           | -0.0017        | 0.0496         | 5.48E-02       |
| 26           | B       | -0.1731         | -0.0358        | 0.0084           | -0.0016        | 0.0474         | 5.49E-02       |
| 27           | B       | -0.2490         | -0.0190        | 0.0123           | 0.0019         | 0.0219         | -1.68E-01      |
| 28           | B       | -0.3347         | -0.0385        | 0.0166           | 0.0003         | 0.0530         | -4.51E-02      |
| 29           | B       | -0.0658         | -0.0229        | 0.0096           | 0.0036         | 0.0627         | -2.54E-02      |
| 30           | B       | 0.2425          | 0.0132         | -0.0710          | -0.0791        | -0.1811        | 1.49E-01       |
| 31           | B       | 0.2480          | 0.0132         | -0.0710          | -0.0791        | -0.1724        | 1.49E-01       |
| 32           | B       | 0.2816          | 0.0152         | -0.0759          | -0.0802        | -0.1695        | -1.58E-02      |
| 33           | B       | -0.0734         | -0.0381        | 0.0070           | -0.0052        | 0.0183         | -6.72E-02      |
| 34           | B       | -0.1874         | -0.0183        | 0.0267           | 0.0211         | 0.0146         | -8.00E-03      |
| 35           | B       | 0.1909          | 0.0383         | -0.0154          | -0.0204        | 0.0668         | -2.12E-02      |
| 36           | B       | -0.0206         | -0.0243        | -0.0119          | -0.0215        | -0.0494        | 7.34E-02       |
| 37           | B       | 0.2853          | 0.0263         | -0.0292          | -0.0330        | -0.0534        | -7.35E-02      |
| 38           | B       | -0.3362         | -0.0385        | 0.0166           | 0.0002         | 0.0573         | -4.55E-02      |
| 39           | B       | -0.2469         | -0.0190        | 0.0124           | 0.0019         | 0.0136         | -1.68E-01      |
| 40           | Cu      | 0.1872          | 0.3064         | 0.4871           | 0.8255         | 0.7541         | 7.19E-01       |
| F1(B39)      |         | -0.1872         | -0.3064        | -0.4869          | -0.8253        | -0.7541        | -0.6760        |
| F2(Cu)       |         | 0.1872          | 0.3064         | 0.4871           | 0.8255         | 0.7541         | 0.7191         |
| Total        |         | 0.0000          | 0.0000         | 0.0001           | 0.0001         | 0.0000         | 0.0431         |

Cu calibration curve construction:

| Charges on Cu | Cu 1s orbital energies | Cu 2s orbital energies | Cu 3s orbital energies | Orbital energies in Cu@B39 complex |
|---------------|------------------------|------------------------|------------------------|------------------------------------|
| -2            | -323.17838             | -38.77958              | -4.19666               | Cu 1s -323.36111                   |
| -1            | -323.22079             | -38.81717              | -4.23776               | Cu 2s -38.94670                    |
| 0             | -323.30118             | -38.89197              | -4.31710               | Cu 3s -4.37551                     |
| 1             | -323.44751             | -39.03023              | -4.46189               |                                    |
| 2             | -323.90611             | -39.52010              | -4.95466               |                                    |

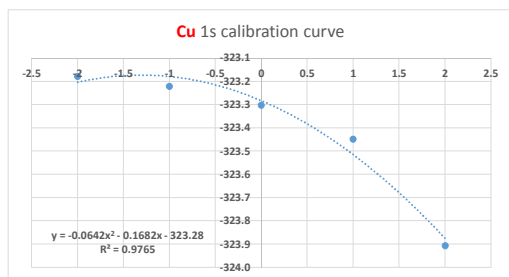

$Q_{\text{predicted}} = 0.416$

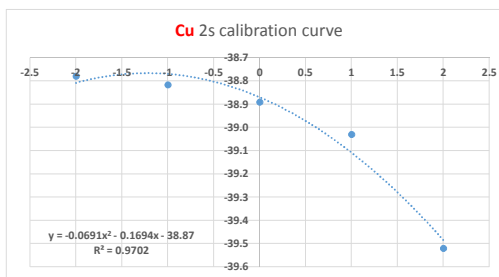

$Q_{\text{predicted}} = 0.391$

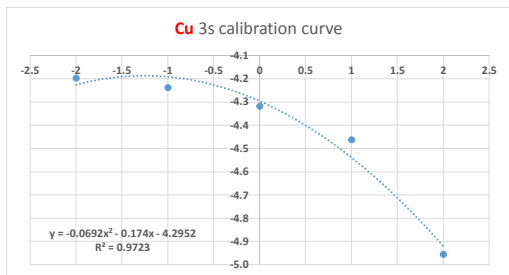

$Q_{\text{predicted}} = 0.398$

| Ag@B39 [0,1] |         | Mulliken Scheme | Lowdin Scheme  | Hirshfeld Scheme | CM5 Scheme     | NPA Scheme     | Bader Scheme   |
|--------------|---------|-----------------|----------------|------------------|----------------|----------------|----------------|
| Atom Number  | Element | Charge density  | Charge density | Charge density   | Charge density | Charge density | Charge density |
| 1            | B       | 0.3475          | 0.0105         | -0.0769          | -0.0831        | -0.1713        | -8.11E-03      |
| 2            | B       | -0.0539         | -0.0336        | -0.0124          | -0.0260        | -0.0442        | 7.58E-02       |
| 3            | B       | -0.1483         | -0.0487        | 0.0066           | -0.0108        | 0.0210         | -6.51E-02      |
| 4            | B       | 0.1399          | 0.0336         | -0.0152          | -0.0223        | 0.0644         | -2.10E-02      |
| 5            | B       | -0.3339         | -0.0358        | 0.0298           | 0.0087         | 0.0833         | -1.87E-02      |
| 6            | B       | 0.3475          | 0.0105         | -0.0769          | -0.0830        | -0.1732        | -6.04E-03      |
| 7            | B       | 0.4576          | 0.0193         | -0.0708          | -0.0796        | -0.1823        | -4.61E-02      |
| 8            | B       | 0.2531          | 0.0224         | -0.0295          | -0.0348        | -0.0503        | -7.00E-02      |
| 9            | B       | -0.3339         | -0.0358        | 0.0299           | 0.0087         | 0.0968         | -1.87E-02      |
| 10           | B       | 0.3345          | 0.0057         | -0.0719          | -0.0833        | -0.1831        | 1.59E-01       |
| 11           | B       | -0.2365         | -0.0287        | 0.0120           | -0.0027        | 0.0197         | -1.68E-01      |
| 12           | B       | -0.1437         | -0.0245        | 0.0263           | 0.0184         | 0.0147         | -7.58E-03      |
| 13           | B       | -0.0539         | -0.0336        | -0.0124          | -0.0260        | -0.0435        | 7.57E-02       |
| 14           | B       | -0.0756         | -0.0294        | 0.0091           | 0.0005         | 0.0651         | -2.51E-02      |
| 15           | B       | 0.4576          | 0.0193         | -0.0708          | -0.0797        | -0.1748        | -4.79E-02      |
| 16           | B       | 0.2531          | 0.0224         | -0.0294          | -0.0348        | -0.0556        | -7.00E-02      |
| 17           | B       | -0.2376         | -0.0449        | 0.0080           | -0.0063        | 0.0481         | 5.58E-02       |
| 18           | B       | 0.4576          | 0.0193         | -0.0707          | -0.0796        | -0.1756        | -4.86E-02      |
| 19           | B       | -0.3339         | -0.0358        | 0.0299           | 0.0088         | 0.0896         | -1.85E-02      |
| 20           | B       | -0.0756         | -0.0294        | 0.0091           | 0.0006         | 0.0648         | -2.50E-02      |
| 21           | B       | -0.1483         | -0.0487        | 0.0066           | -0.0108        | 0.0257         | -6.50E-02      |
| 22           | B       | -0.1437         | -0.0245        | 0.0262           | 0.0183         | 0.0151         | -7.74E-03      |
| 23           | B       | 0.1399          | 0.0336         | -0.0153          | -0.0223        | 0.0641         | -1.98E-02      |
| 24           | B       | -0.3504         | -0.0523        | 0.0163           | -0.0067        | 0.0564         | -4.27E-02      |
| 25           | B       | -0.2376         | -0.0449        | 0.0079           | -0.0064        | 0.0504         | 5.59E-02       |
| 26           | B       | -0.2376         | -0.0449        | 0.0079           | -0.0063        | 0.0490         | 5.57E-02       |
| 27           | B       | -0.2365         | -0.0287        | 0.0120           | -0.0027        | 0.0188         | -1.68E-01      |
| 28           | B       | -0.3504         | -0.0523        | 0.0164           | -0.0067        | 0.0521         | -4.29E-02      |
| 29           | B       | -0.0756         | -0.0294        | 0.0090           | 0.0005         | 0.0640         | -2.52E-02      |
| 30           | B       | 0.3345          | 0.0057         | -0.0719          | -0.0833        | -0.1762        | 1.60E-01       |
| 31           | B       | 0.3345          | 0.0057         | -0.0719          | -0.0833        | -0.1739        | 1.60E-01       |
| 32           | B       | 0.3475          | 0.0105         | -0.0769          | -0.0831        | -0.1719        | -9.58E-03      |
| 33           | B       | -0.1483         | -0.0487        | 0.0065           | -0.0108        | 0.0216         | -6.50E-02      |
| 34           | B       | -0.1437         | -0.0245        | 0.0262           | 0.0183         | 0.0133         | -7.71E-03      |
| 35           | B       | 0.1399          | 0.0336         | -0.0153          | -0.0223        | 0.0629         | -1.95E-02      |
| 36           | B       | -0.0539         | -0.0336        | -0.0124          | -0.0260        | -0.0487        | 7.57E-02       |
| 37           | B       | 0.2531          | 0.0224         | -0.0294          | -0.0348        | -0.0490        | -6.95E-02      |
| 38           | B       | -0.3504         | -0.0523        | 0.0164           | -0.0067        | 0.0586         | -4.27E-02      |
| 39           | B       | -0.2365         | -0.0287        | 0.0121           | -0.0027        | 0.0164         | -1.68E-01      |
| 40           | Ag      | 0.1418          | 0.6196         | 0.5059           | 0.9843         | 0.7376         | 5.86E-01       |
| F1(B39)      |         | -0.1418         | -0.6196        | -0.5058          | -0.9843        | -0.7376        | -0.5444        |
| F2(Ag)       |         | 0.1418          | 0.6196         | 0.5059           | 0.9843         | 0.7376         | 0.5861         |
| Total        |         | 0.0000          | 0.0000         | 0.0001           | 0.0001         | 0.0000         | 0.0418         |

Ag calibration curve construction:

| Charges on Ag | Ag 4s orbital energies |
|---------------|------------------------|
| -2            | -3.67322               |
| -1            | -3.67644               |
| 0             | -3.75852               |
| 1             | -3.89155               |
| 2             | -4.27212               |

Orbital energies in Ag@B39 complex  
Ag 4s -3.81311

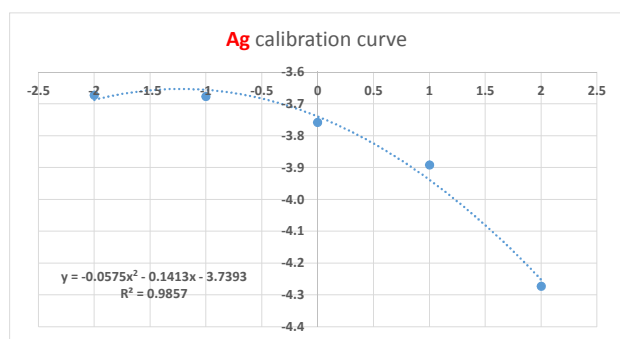

$Q_{\text{predicted}} = 0.443$

| Au@B39 [0,1] |         | Mulliken Scheme | Lowdin Scheme  | Hirshfeld Scheme | CM5 Scheme     | NPA Scheme     | Bader Scheme   |
|--------------|---------|-----------------|----------------|------------------|----------------|----------------|----------------|
| Atom Number  | Element | Charge density  | Charge density | Charge density   | Charge density | Charge density | Charge density |
| 1            | B       | 0.3406          | 0.0089         | -0.0811          | -0.0865        | -0.1838        | 5.42E-04       |
| 2            | B       | -0.0424         | -0.0365        | -0.0142          | -0.0259        | -0.0472        | 7.73E-02       |
| 3            | B       | -0.1203         | -0.0514        | 0.0068           | -0.0082        | 0.0212         | -6.52E-02      |
| 4            | B       | 0.1307          | 0.0332         | -0.0168          | -0.0229        | 0.0641         | -1.81E-02      |
| 5            | B       | -0.3016         | -0.0412        | 0.0301           | 0.0119         | 0.0921         | -1.39E-02      |
| 6            | B       | 0.3385          | 0.0089         | -0.0811          | -0.0864        | -0.1911        | 2.72E-03       |
| 7            | B       | 0.4507          | 0.0180         | -0.0739          | -0.0816        | -0.1915        | -3.97E-02      |
| 8            | B       | 0.2016          | 0.0220         | -0.0321          | -0.0367        | -0.0613        | -6.09E-02      |
| 9            | B       | -0.3001         | -0.0412        | 0.0302           | 0.0120         | 0.0987         | -1.36E-02      |
| 10           | B       | 0.3613          | 0.0065         | -0.0718          | -0.0817        | -0.1843        | 1.57E-01       |
| 11           | B       | -0.1681         | -0.0319        | 0.0115           | -0.0012        | 0.0186         | -1.63E-01      |
| 12           | B       | -0.0955         | -0.0249        | 0.0250           | 0.0182         | 0.0199         | -3.17E-03      |
| 13           | B       | -0.0391         | -0.0365        | -0.0141          | -0.0259        | -0.0465        | 7.72E-02       |
| 14           | B       | -0.0763         | -0.0306        | 0.0074           | 0.0000         | 0.0709         | -2.07E-02      |
| 15           | B       | 0.4485          | 0.0180         | -0.0740          | -0.0816        | -0.1844        | -4.16E-02      |
| 16           | B       | 0.2028          | 0.0220         | -0.0320          | -0.0366        | -0.0625        | -6.00E-02      |
| 17           | B       | -0.2170         | -0.0484        | 0.0064           | -0.0059        | 0.0498         | 5.89E-02       |
| 18           | B       | 0.4482          | 0.0180         | -0.0739          | -0.0815        | -0.1842        | -4.25E-02      |
| 19           | B       | -0.3003         | -0.0412        | 0.0302           | 0.0120         | 0.0878         | -1.38E-02      |
| 20           | B       | -0.0746         | -0.0306        | 0.0074           | 0.0000         | 0.0721         | -2.04E-02      |
| 21           | B       | -0.1178         | -0.0514        | 0.0068           | -0.0082        | 0.0299         | -6.52E-02      |
| 22           | B       | -0.0987         | -0.0249        | 0.0250           | 0.0181         | 0.0211         | -3.29E-03      |
| 23           | B       | 0.1316          | 0.0332         | -0.0169          | -0.0229        | 0.0681         | -1.82E-02      |
| 24           | B       | -0.2644         | -0.0587        | 0.0165           | -0.0034        | 0.0521         | -3.45E-02      |
| 25           | B       | -0.2235         | -0.0485        | 0.0063           | -0.0060        | 0.0531         | 5.88E-02       |
| 26           | B       | -0.2199         | -0.0485        | 0.0063           | -0.0060        | 0.0508         | 5.88E-02       |
| 27           | B       | -0.1699         | -0.0319        | 0.0115           | -0.0012        | 0.0198         | -1.63E-01      |
| 28           | B       | -0.2643         | -0.0587        | 0.0165           | -0.0034        | 0.0479         | -3.44E-02      |
| 29           | B       | -0.0747         | -0.0306        | 0.0073           | -0.0001        | 0.0708         | -2.07E-02      |
| 30           | B       | 0.3583          | 0.0065         | -0.0718          | -0.0817        | -0.1770        | 1.58E-01       |
| 31           | B       | 0.3615          | 0.0065         | -0.0718          | -0.0817        | -0.1755        | 1.58E-01       |
| 32           | B       | 0.3396          | 0.0089         | -0.0812          | -0.0865        | -0.1843        | -6.84E-04      |
| 33           | B       | -0.1204         | -0.0514        | 0.0067           | -0.0082        | 0.0202         | -6.53E-02      |
| 34           | B       | -0.0992         | -0.0249        | 0.0250           | 0.0182         | 0.0195         | -3.16E-03      |
| 35           | B       | 0.1331          | 0.0333         | -0.0169          | -0.0229        | 0.0635         | -1.66E-02      |
| 36           | B       | -0.0420         | -0.0365        | -0.0142          | -0.0259        | -0.0511        | 7.73E-02       |
| 37           | B       | 0.2028          | 0.0220         | -0.0320          | -0.0366        | -0.0548        | -6.08E-02      |
| 38           | B       | -0.2648         | -0.0587        | 0.0165           | -0.0034        | 0.0547         | -3.44E-02      |
| 39           | B       | -0.1667         | -0.0319        | 0.0116           | -0.0011        | 0.0135         | -1.63E-01      |
| 40           | Au      | -0.5885         | 0.7055         | 0.5596           | 0.9720         | 0.7995         | 4.17E-01       |
| F1(B39)      |         | 0.5885          | -0.7055        | -0.5592          | -0.9717        | -0.7995        | -0.3758        |
| F2(Au)       |         | -0.5885         | 0.7055         | 0.5596           | 0.9720         | 0.7995         | 0.4170         |
| Total        |         | 0.0000          | 0.0000         | 0.0004           | 0.0004         | 0.0000         | 0.0412         |

Au calibration curve construction:

| Charges on Au | Au 5s orbital energies | Orbital energies in Au@B39 complex |
|---------------|------------------------|------------------------------------|
| -2            | -4.05093               | Au 5s                              |
| -1            | -4.06707               | -4.22134                           |
| 0             | -4.16613               |                                    |
| 1             | -4.30664               |                                    |
| 2             | -4.6373                |                                    |

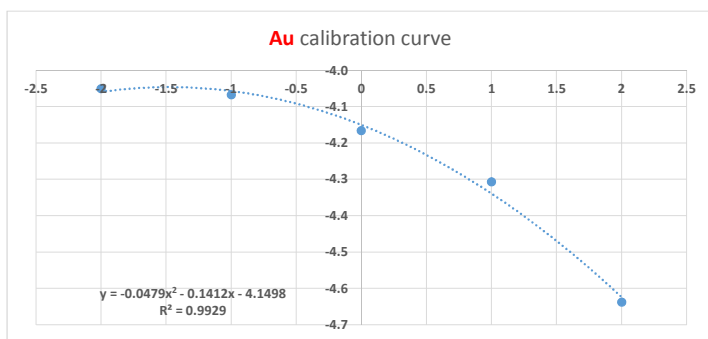

$Q_{\text{predicted}} = 0.441$

| Sc3N@B39 [0,1] |         | Mulliken Scheme | Lowdin Scheme  | Hirshfeld Scheme | CM5 Scheme     | NPA Scheme     | Bader Scheme   |
|----------------|---------|-----------------|----------------|------------------|----------------|----------------|----------------|
| Atom Number    | Element | Charge density  | Charge density | Charge density   | Charge density | Charge density | Charge density |
| 1              | C       | 0.0179          | -0.0106        | -0.0109          | -0.0175        | -0.0188        |                |
| 2              | C       | -0.0788         | -0.0118        | 0.0099           | -0.0001        | -0.0004        |                |
| 3              | C       | 0.0976          | -0.0038        | -0.0159          | -0.0472        | -0.1062        |                |
| 4              | C       | 0.0483          | -0.0021        | -0.0093          | -0.0334        | -0.0767        |                |
| 5              | C       | -0.0137         | -0.0149        | -0.0245          | -0.0259        | -0.0435        |                |
| 6              | C       | -0.0982         | -0.0140        | -0.0196          | -0.0226        | -0.0343        |                |
| 7              | C       | 0.0004          | -0.0102        | 0.0116           | 0.0094         | 0.0439         |                |
| 8              | C       | -0.1586         | -0.0115        | -0.0171          | -0.0225        | -0.0311        |                |
| 9              | C       | -0.1765         | -0.0144        | -0.0178          | -0.0229        | -0.0276        |                |
| 10             | C       | -0.0603         | -0.0154        | 0.0058           | 0.0012         | 0.0147         |                |
| 11             | C       | -0.0213         | -0.0037        | -0.0082          | -0.0267        | -0.0647        |                |
| 12             | C       | -0.0565         | -0.0131        | -0.0177          | -0.0204        | -0.0167        |                |
| 13             | C       | 0.1029          | -0.0070        | -0.0142          | -0.0346        | -0.0786        |                |
| 14             | C       | 0.0544          | -0.0080        | -0.0329          | -0.0804        | -0.1459        |                |
| 15             | C       | 0.0636          | -0.0169        | 0.0029           | -0.0260        | -0.0533        |                |
| 16             | C       | -0.0376         | -0.0081        | -0.0152          | -0.0225        | -0.0397        |                |
| 17             | C       | 0.0251          | -0.0061        | -0.0130          | -0.0261        | -0.0598        |                |
| 18             | C       | 0.0597          | -0.0207        | -0.0059          | -0.0446        | -0.0825        |                |
| 19             | C       | 0.1016          | -0.0084        | -0.0171          | -0.0409        | -0.0921        |                |
| 20             | C       | 0.1155          | -0.0074        | -0.0377          | -0.0906        | -0.1448        |                |
| 21             | C       | 0.0967          | -0.0072        | -0.0141          | -0.0344        | -0.0819        |                |
| 22             | C       | 0.0634          | -0.0167        | 0.0032           | -0.0253        | -0.0543        |                |
| 23             | C       | 0.0458          | -0.0022        | -0.0094          | -0.0338        | -0.0773        |                |
| 24             | C       | 0.0562          | -0.0080        | -0.0327          | -0.0798        | -0.1445        |                |
| 25             | C       | 0.1054          | -0.0084        | -0.0170          | -0.0410        | -0.0963        |                |
| 26             | C       | 0.0324          | -0.0060        | -0.0130          | -0.0263        | -0.0588        |                |
| 27             | C       | 0.0596          | -0.0208        | -0.0061          | -0.0451        | -0.0814        |                |
| 28             | C       | 0.1139          | -0.0074        | -0.0378          | -0.0908        | -0.1449        |                |
| 29             | C       | -0.0147         | -0.0150        | -0.0245          | -0.0260        | -0.0429        |                |
| 30             | C       | -0.0027         | -0.0103        | 0.0117           | 0.0094         | 0.0421         |                |
| 31             | C       | -0.1568         | -0.0115        | -0.0170          | -0.0224        | -0.0323        |                |
| 32             | C       | -0.1001         | -0.0141        | -0.0195          | -0.0226        | -0.0343        |                |
| 33             | C       | -0.1618         | -0.0115        | -0.0170          | -0.0224        | -0.0303        |                |
| 34             | C       | -0.0812         | -0.0119        | 0.0099           | 0.0000         | 0.0002         |                |
| 35             | C       | 0.0636          | -0.0162        | -0.0213          | -0.0251        | -0.0297        |                |
| 36             | C       | 0.0946          | -0.0038        | -0.0157          | -0.0468        | -0.1096        |                |
| 37             | C       | 0.1095          | -0.0083        | -0.0171          | -0.0412        | -0.0973        |                |
| 38             | C       | 0.1170          | -0.0074        | -0.0379          | -0.0909        | -0.1458        |                |
| 39             | C       | 0.0587          | -0.0209        | -0.0063          | -0.0456        | -0.0849        |                |
| 40             | C       | 0.0353          | -0.0059        | -0.0129          | -0.0265        | -0.0616        |                |
| 41             | C       | -0.0392         | -0.0084        | -0.0156          | -0.0226        | -0.0404        |                |
| 42             | C       | 0.0602          | -0.0167        | 0.0033           | -0.0249        | -0.0551        |                |
| 43             | C       | 0.0960          | -0.0072        | -0.0141          | -0.0343        | -0.0804        |                |
| 44             | C       | 0.0548          | -0.0080        | -0.0325          | -0.0794        | -0.1463        |                |
| 45             | C       | -0.0231         | -0.0038        | -0.0081          | -0.0267        | -0.0656        |                |
| 46             | C       | -0.0590         | -0.0154        | 0.0058           | 0.0012         | 0.0180         |                |
| 47             | C       | -0.1747         | -0.0144        | -0.0178          | -0.0229        | -0.0231        |                |
| 48             | C       | -0.0508         | -0.0129        | -0.0175          | -0.0201        | -0.0137        |                |
| 49             | C       | 0.0508          | -0.0022        | -0.0096          | -0.0342        | -0.0812        |                |
| 50             | C       | 0.0209          | -0.0123        | -0.0147          | -0.0181        | -0.0160        |                |
| 51             | C       | -0.0702         | -0.0118        | 0.0085           | 0.0026         | 0.0129         |                |
| 52             | C       | 0.0024          | -0.0123        | -0.0197          | -0.0213        | -0.0230        |                |
| 53             | C       | 0.0973          | -0.0039        | -0.0160          | -0.0473        | -0.1058        |                |
| 54             | C       | -0.0785         | -0.0118        | 0.0100           | -0.0002        | 0.0021         |                |
| 55             | C       | 0.0156          | -0.0107        | -0.0109          | -0.0176        | -0.0174        |                |
| 56             | C       | 0.0624          | -0.0162        | -0.0215          | -0.0253        | -0.0328        |                |
| 57             | C       | 0.0736          | -0.0083        | -0.0157          | -0.0167        | -0.0108        |                |
| 58             | C       | -0.1218         | -0.0087        | 0.0073           | 0.0069         | 0.0163         |                |
| 59             | C       | 0.0678          | -0.0083        | -0.0158          | -0.0167        | -0.0112        |                |
| 60             | C       | 0.0695          | -0.0082        | -0.0157          | -0.0166        | -0.0104        |                |
| 61             | C       | -0.1008         | -0.0141        | -0.0195          | -0.0226        | -0.0352        |                |
| 62             | C       | 0.0206          | -0.0107        | -0.0110          | -0.0174        | -0.0188        |                |
| 63             | C       | -0.0038         | -0.0103        | 0.0117           | 0.0094         | 0.0444         |                |
| 64             | C       | -0.0108         | -0.0149        | -0.0245          | -0.0259        | -0.0435        |                |
| 65             | C       | -0.0302         | -0.0038        | -0.0084          | -0.0267        | -0.0617        |                |
| 66             | C       | -0.0535         | -0.0129        | -0.0177          | -0.0203        | -0.0154        |                |
| 67             | C       | -0.0557         | -0.0154        | 0.0056           | 0.0010         | 0.0162         |                |
| 68             | C       | -0.1759         | -0.0144        | -0.0179          | -0.0230        | -0.0270        |                |
| 69             | C       | 0.0204          | -0.0124        | -0.0148          | -0.0181        | -0.0165        |                |
| 70             | C       | 0.0042          | -0.0123        | -0.0197          | -0.0213        | -0.0229        |                |
| 71             | C       | -0.0702         | -0.0118        | 0.0083           | 0.0026         | 0.0146         |                |
| 72             | C       | 0.0612          | -0.0163        | -0.0215          | -0.0253        | -0.0345        |                |
| 73             | C       | 0.0391          | -0.0098        | -0.0195          | -0.0204        | -0.0291        |                |

|          |    |         |         |         |         |         |           |
|----------|----|---------|---------|---------|---------|---------|-----------|
| 74       | C  | 0.0386  | -0.0099 | -0.0195 | -0.0204 | -0.0287 |           |
| 75       | C  | -0.1209 | -0.0049 | 0.0116  | 0.0111  | 0.0342  |           |
| 76       | C  | 0.0351  | -0.0098 | -0.0195 | -0.0203 | -0.0291 |           |
| 77       | C  | 0.0054  | -0.0124 | -0.0196 | -0.0213 | -0.0234 |           |
| 78       | C  | -0.0376 | -0.0083 | -0.0154 | -0.0225 | -0.0416 |           |
| 79       | C  | -0.0686 | -0.0117 | 0.0084  | 0.0026  | 0.0153  |           |
| 80       | C  | 0.0190  | -0.0123 | -0.0147 | -0.0180 | -0.0163 |           |
| 81       | Sc | 0.4269  | 0.3785  | 0.5106  | 1.0990  | 1.8638  | 1.87E+00  |
| 82       | Sc | 0.4286  | 0.3785  | 0.5107  | 1.0991  | 1.8637  | 1.87E+00  |
| 83       | Sc | 0.4259  | 0.3780  | 0.5101  | 1.0986  | 1.8643  | 1.86E+00  |
| 84       | N  | -1.3713 | -0.2837 | -0.5627 | -1.2350 | -2.1653 | -1.82E+00 |
| F1(B39)  |    | 0.0899  | -0.8512 | -0.9692 | -2.0622 | -3.4265 | 0.0000    |
| F2(SC3N) |    | -0.0899 | 0.8512  | 0.9687  | 2.0617  | 3.4265  | 3.7720    |
| Total    |    | 0.0000  | 0.0000  | -0.0005 | -0.0005 | 0.0000  | 3.7720    |

Sc+N calibration curve construction:

Charges on Sc3N

| Charges on Sc3N | Sc 1s orbital energies | N 1s orbital energies |
|-----------------|------------------------|-----------------------|
| -2              | -161.91662             | -14.30738             |
| -1              | -161.95064             | -14.31969             |
| 0               | -161.96970             | -14.34887             |
| 1               | -161.96222             | -14.34855             |
| 2               | -162.03197             | -14.3908              |

Orbital energies in Sc3N@C80 complex

|       |           |
|-------|-----------|
| Sc 1s | -161.9945 |
| N 1s  | -14.37341 |

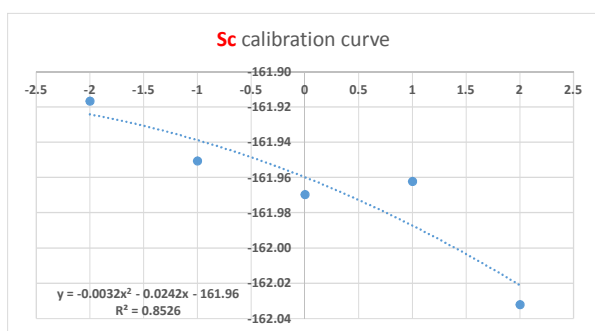

$Q_{\text{predicted}}^{\text{Sc}} = 1.226$

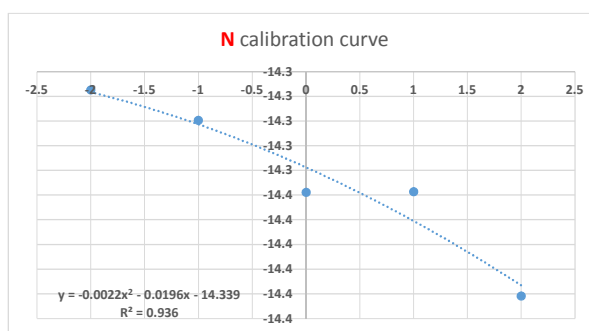

$Q_{\text{predicted}}^{\text{N}} = 1.502$



## References:

1. Stasyuk, A. J. & Solà, M. Does the endohedral borospherene supersalt  $\text{FLi}_2@B_{39}$  maintain the "super" properties of its subunits? *Phys. Chem. Chem. Phys.* **19**, 21276-21281, doi:10.1039/C7CP02550E (2017).
2. Weigend, F. & Ahlrichs, R. Balanced basis sets of split valence, triple zeta valence and quadruple zeta valence quality for H to Rn: Design and assessment of accuracy. *Phys. Chem. Chem. Phys.* **7**, 3297-3305, doi:10.1039/B508541A (2005).
3. Weigend, F. Accurate Coulomb-fitting basis sets for H to Rn. *Phys. Chem. Chem. Phys.* **8**, 1057-1065, doi:10.1039/B515623H (2006).
4. M. J. Frisch, G. W. Trucks, H. B. Schlegel, G. E. Scuseria, M. A. Robb, J. R. Cheeseman, G. Scalmani, V. Barone, G. A. Petersson, H. Nakatsuji, X. Li, M. Caricato, A. V. Marenich, J. Bloino, B. G. Janesko, R. Gomperts, B. Mennucci, H. P. Hratchian, J. V. Ortiz, A. F. Izmaylov, J. L. Sonnenberg, Williams, F. Ding, F. Lipparini, F. Egidi, J. Goings, B. Peng, A. Petrone, T. Henderson, D. Ranasinghe, V. G. Zakrzewski, J. Gao, N. Rega, G. Zheng, W. Liang, M. Hada, M. Ehara, K. Toyota, R. Fukuda, J. Hasegawa, M. Ishida, T. Nakajima, Y. Honda, O. Kitao, H. Nakai, T. Vreven, K. Throssell, J. A. Montgomery Jr., J. E. Peralta, F. Ogliaro, M. J. Bearpark, J. J. Heyd, E. N. Brothers, K. N. Kudin, V. N. Staroverov, T. A. Keith, R. Kobayashi, J. Normand, K. Raghavachari, A. P. Rendell, J. C. Burant, S. S. Iyengar, J. Tomasi, M. Cossi, J. M. Millam, M. Klene, C. Adamo, R. Cammi, J. W. Ochterski, R. L. Martin, K. Morokuma, O. Farkas, J. B. Foresman and D. J. Fox, Gaussian 09, revision E.01; Gaussian, Inc.: Wallingford, CT, 2009.
5. Mulliken, R. S. Electronic Population Analysis on LCAO–MO Molecular Wave Functions. I. *J. Chem. Phys.* **23**, 1833-1840, doi:10.1063/1.1740588 (1955).
6. Mulliken, R. S. Electronic Population Analysis on LCAO–MO Molecular Wave Functions. II. Overlap Populations, Bond Orders, and Covalent Bond Energies. *J. Chem. Phys.* **23**, 1841-1846, doi:10.1063/1.1740589 (1955).
7. Löwdin, P. O. On the Non-Orthogonality Problem Connected with the Use of Atomic Wave Functions in the Theory of Molecules and Crystals. *J. Chem. Phys.* **18**, 365-375, doi:10.1063/1.1747632 (1950).
8. Hirshfeld, F. L. Bonded-atom fragments for describing molecular charge densities. *Theor. Chim. Acta* **44**, 129-138, doi:10.1007/bf00549096 (1977).
9. Ritchie, J. P. & Bachrach, S. M. Some methods and applications of electron density distribution analysis. *J. Comput. Chem.*, **8**, 499-509, doi:10.1002/jcc.540080430 (1987).
10. Marenich, A. V., Jerome, S. V., Cramer, C. J. & Truhlar, D. G. Charge Model 5: An Extension of Hirshfeld Population Analysis for the Accurate Description of Molecular Interactions in Gaseous and Condensed Phases. *J. Chem. Theory Comput.* **8**, 527-541, doi:10.1021/ct200866d (2012).
11. Bader, R. F. W. *Atoms in Molecules: A Quantum Theory* (Oxford, 1990).
12. Bader, R. F. W. A quantum theory of molecular structure and its applications. *Chem. Rev.* **91**, 893-928, doi:10.1021/cr00005a013 (1991).
13. AIMAll (Version 14.06.21), Todd A. Keith, TK Gristmill Software, Overland Park KS, USA, 2014 (aim.tkgristmill.com)
14. NBO 6.0. E. D. Glendening, J. K. Badenhoop, A. E. Reed, J. E. Carpenter, J. A. Bohmann, C. M. Morales, C. R. Landis, and F. Weinhold (Theoretical Chemistry Institute, University of Wisconsin, Madison, WI, 2013); <http://nbo6.chem.wisc.edu/>
